# Supplementary material for: An expedient synthesis of new imino-thiazolidinone grafted dispiro-pyrrolidine-oxindole/indeno hybrids via a multicomponent [3+2] cycloaddition reaction in a deep eutectic solvent
Source: Royal Society of Chemistry journal article supplement (doi:10.1039/d0nj00801j), 2020-01-01
Supplement: d0nj00801j1.pdf [file d0nj00801j1.pdf]

## **An expedient synthesis of new imino-thiazolidinone grafted dispiro-pyrrolidine-oxindole/indeno hybrids via multicomponent [3+2] cycloaddition reaction in deep eutectic solvent**

Ruby Singh,\* Munna Ram Saini, Diksha Bhardwaj and Aakash Singh

Department of Chemistry, School of Basic Sciences,

Jaipur National University, Jaipur, Rajasthan

Email: [drrubychem@yahoo.com](mailto:drrubychem@yahoo.com)

### **Supporting Data**

1. General procedure for synthesis of dispiro-pyrrolidine-oxindole/indeno hybrid **4a-l** and **7a-d**.
2. The spectroscopic data revealed the formation of the final products.
3. Spectra (<sup>1</sup>HNMR, <sup>13</sup>CNMR, Mass (S1-S34)). (In <sup>1</sup>HNMR spectra the peaks at around  $\delta$  3.31 and  $\delta$  2.46 ppm and around multiple signal at around  $\delta$  40 ppm in <sup>13</sup>CNMR is comes due to solvent DMSO-*d*<sub>6</sub>).
4. Crystal data and structure refinement for **4d**.

### **Experimental Section**

Analytical grade solvents and commercially available reagents were used without further purification. The melting points of all compounds were determined on a Digital melting point apparatus. The purity of compounds was checked on thin layers of silica Gel-G coated glass plates and benzene: ethyl acetate (8:2) as eluent. <sup>1</sup>H and <sup>13</sup>C NMR spectra were recorded in dimethyl sulfoxide (DMSO-*d*<sub>6</sub>) and chloroform (CDCl<sub>3</sub>) as a solvent on a Jeol Resonance at 400 MHz and 100MHz, respectively. Chemical shifts are expressed in parts per million (ppm) using tetramethylsilane (TMS) as an internal standard. The following abbreviations were used to explain the multiplicities: s = singlet, d = doublet, t = triplet, q = quartet, m = multiplet. The Mass spectra of representative compounds were obtained using Xevo G2-SQToF (water, USA). Elemental analysis was carried out on a Euro-E 3000 CHN Elemental analyzer. Single crystal X-ray structural studies were performed on Make/Model: Bruker Kappa Apex II diffractometer at SAIF Cochin/Eranakulam, Kerala.

### **General procedure for the synthesis of dispiro-pyrrolidines 4 / 7.**

An equimolar mixture of appropriate 4-oxo-3-aryl-2-(arylimino)thiazolidin-5-ylidenes **1** (1 mmol), isatin **2**/ ninhydrine **6** and sarcosine **3** (1 mmol) in DES (10 ml) were taken in a round bottom flask and stirred the reaction mixture at 80 °C for 2-2.5 hrs. At the end of

reaction confirmed by TLC, the reaction mixture was cooled at room temperature. Then, it was extracted using ethyl acetate. The ethyl acetate phase containing product was separated from undissolved DES and extra ethyl acetate was evaporated under reduced pressure to obtain crude solid residue that was then crystallized from ethanol to obtain pure cyclo adducts. All compounds **4a-l** and **7a-d** was prepared by this manner (Table 2 and 3). Synthesized compounds were well characterized by <sup>1</sup>H NMR, <sup>13</sup>C NMR, Mass and single crystal X-ray analysis of representative compound. For crystallography the crystals of compound was grown by slow evaporation technique using ethanol as solvent.

To recover the used deep eutectic solvent, it was washed with ethyl acetate to remove all material traces, deep eutectic solvent showed comparable yield in three subsequent reactions.

### Characterization data

#### Methyl-1',5-dimethyl-2,4''-dioxo-3''-phenyl-2''-(phenylimino)dispiro[indoline-3,2'-pyrrolidine-3',5''-thiazolidine]-4'-carboxylate (**4a**):

<sup>1</sup>H NMR (CDCl<sub>3</sub>, 400 MHz): δ 2.18 (s, 3H, N-CH<sub>3</sub>), 2.25 (s, 3H, CH<sub>3</sub>), 3.54 (t, 1H, CH, *J* = 8.8 Hz), 3.76 (s, 3H, OCH<sub>3</sub>), 4.03 (t, 1H, CH, *J* = 9.2 Hz), 4.25 (t, 1H, CH, *J* = 8.8 Hz), 6.65-7.41 (m, 13H, Ar-H), 7.91 (s, 1H, NH) ppm; <sup>13</sup>C NMR (CDCl<sub>3</sub>, 100 MHz): δ 21.1, 35.7, 49.9, 52.4, 54.0, 65.8 (spiro carbon), 79.8 (spiro carbon) 110.0, 120.8, 122.0, 124.7, 128.0, 128.4, 128.9, 129.1, 131.5, 134.1, 136.1, 140.0, 147.65, 152.1 (aromatic carbons), 169.8, 173.2, 175.6 (three C=O) ppm; MS (*m/z*): 527.17 [M+H]<sup>+</sup>; Anal. calcd. for C<sub>29</sub>H<sub>26</sub>N<sub>4</sub>O<sub>4</sub>S : C 66.14; H 4.98; N 10.64 %. Found: C 66.29, H 4.95, N 10.60 %.

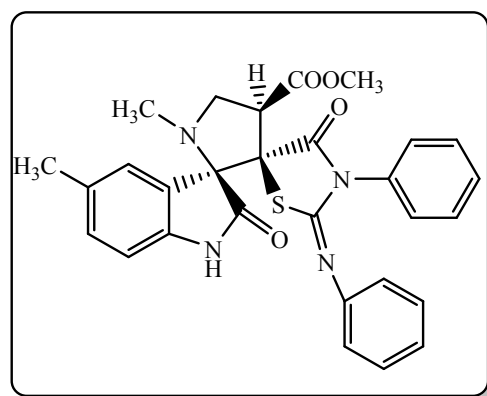

#### Methyl-1'-methyl-2,4''-dioxo-3''-phenyl-2''-(phenylimino)dispiro[indoline-3,2'-pyrrolidine-3',5''-thiazolidine]-4'-carboxylate (**4b**):

<sup>1</sup>H NMR (DMSO-*d*<sub>6</sub>, 400 MHz): δ 2.01 (s, 3H, N-CH<sub>3</sub>), 3.33-3.54 (m, 1H, CH), 3.69 (s, 3H, OCH<sub>3</sub>), 4.33 (t, 1H, CH, *J* = 6.8 Hz), 4.91 (t, 1H, CH, *J* = 6.8, 7.6 Hz), 6.74 - 7.42 (m, 14H, Ar-H), 10.55 (s, 1H, NH) ppm; <sup>13</sup>C NMR (DMSO-*d*<sub>6</sub>, 100 MHz): δ 35.6, 51.1, 52.9, 56.5, 70.2 (spiro carbon), 78.5 (spiro carbon), 110.3, 120.7, 122.6, 123.5, 126.1, 128.2, 129.5, 129.8, 130.0, 131.4, 134.1, 143.9, 148.3, 152.8 (aromatic

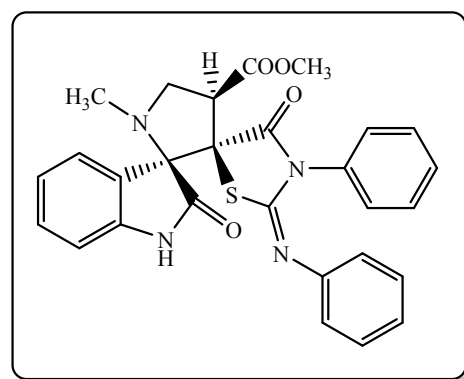

carbons), 170.0, 170.1, 175.3 (three C=O) ppm; MS (m/z): 513.19 [M+H]<sup>+</sup>; Anal. calcd. for C<sub>28</sub>H<sub>24</sub>N<sub>4</sub>O<sub>4</sub>S : C 65.61; H 4.72; N 10.93 %. Found: C 65.76, H 4.75, N 10.90 %.

**Methyl-5-chloro-1'-methyl-2,4''-dioxo-3''-phenyl-2''-(phenylimino)dispiro[indoline-3,2'-pyrrolidine-3',5''-thiazolidine]-4'-carboxylate (4c):**

<sup>1</sup>H NMR (CDCl<sub>3</sub>, 400 MHz): δ 2.18 (s, 3H, N-CH<sub>3</sub>), 3.52 (t, 1H, CH, *J* = 8.8 Hz), 3.77 (s, 3H, OCH<sub>3</sub>), 4.01 (t, 1H, CH, *J* = 9.2, 8.8 Hz), 4.22 (t, 1H, CH, *J* = 8.4 Hz), 6.66 - 7.45 (m, 13H, Ar-H), 8.15 (s, 1H, NH) ppm; <sup>13</sup>C NMR (CDCl<sub>3</sub>, 100 MHz): δ 35.7, 50.3, 52.5, 53.9, 65.8 (spiro carbon), 79.7 (spiro carbon), 111.3, 120.7, 124.8, 128.0, 128.1, 129.2, 129.4, 129.8, 132.5, 134.7, 141.3, 147.5, 151.7 (aromatic carbons), 169.6, 173.1, 175.4 (three C=O) ppm; MS (m/z): 547.11 [M+H]<sup>+</sup>; Anal. calcd. for C<sub>28</sub>H<sub>23</sub>ClN<sub>4</sub>O<sub>4</sub>S : C 61.48; H 4.24; N 10.24 %. Found: C 61.28, H 4.27, N 10.21 %.

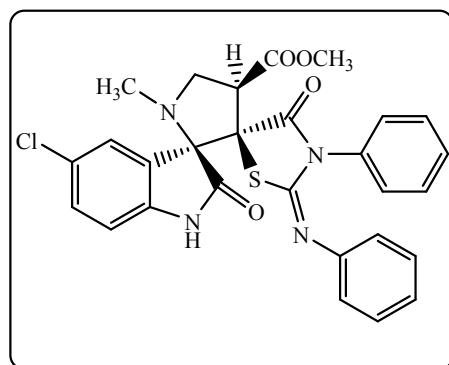

**Methyl-1',5,7-trimethyl-2,4''-dioxo-3''-phenyl-2''-(phenylimino)dispiro[indoline-3,2'-pyrrolidine-3',5''-thiazolidine]-4'-carboxylate (4d):**

<sup>1</sup>H NMR (DMSO-*d*<sub>6</sub>, 400 MHz): δ 1.97 (s, 3H, N-CH<sub>3</sub>), 2.14 (s, 3H, CH<sub>3</sub>), 2.17 (s, 3H, CH<sub>3</sub>), 3.33 (t, 1H, CH, *J* = 6.4 Hz), 3.64 (s, 3H, OCH<sub>3</sub>), 3.75 (t, 1H, CH, *J* = 8.8, 9.2 Hz), 4.10 (t, 1H, CH, *J* = 8.8, 8.4 Hz), 6.58-7.46 (m, 12H, Ar-H), 10.67 (s, 1H, NH) ppm; <sup>13</sup>C NMR (DMSO-*d*<sub>6</sub>, 100 MHz): δ 21.1, 24.9, 35.1, 47.0, 52.8, 53.0, 65.3 (spiro carbon), 74.3 (spiro carbon), 111.0, 111.1, 117.5, 117.8, 122.5, 126.5, 126.6, 129.6, 130.0, 133.4, 134.2, 139.2, 146.8, 152.7, 156.6, 159.0 (aromatic carbons), 168.8, 169.5, 176.5 (three C=O) ppm; MS (m/z): 541.10 [M+H]<sup>+</sup>; Anal. calcd. for C<sub>30</sub>H<sub>28</sub>N<sub>4</sub>O<sub>4</sub>S : C 66.65; H 5.22; N 10.36 %. Found: C 66.50, H 5.25, N 10.33 %.

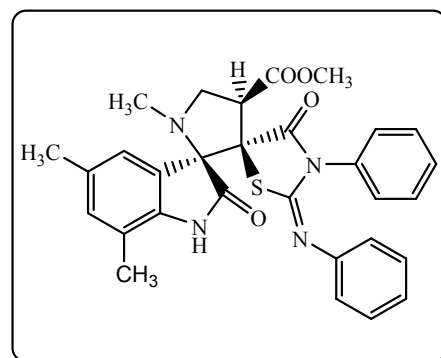

**Methyl-5-fluoro-1'-methyl-2,4''-dioxo-3''-phenyl-2''-(phenylimino)dispiro[indoline-3,2'-pyrrolidine-3',5''-thiazolidine]-4'-carboxylate (4e):**

<sup>1</sup>H NMR (DMSO-*d*<sub>6</sub>, 400 MHz): δ 2.25 (s, 3H, N-CH<sub>3</sub>), 3.62 (t, 1H, CH, *J* = 8.8, 9.2 Hz), 3.97 (s, 3H, OCH<sub>3</sub>), 4.29 (t, 1H, CH, *J* = 8.8 Hz), 4.42 (t, 1H, CH, *J* = 8.4 Hz), 6.86-7.85 (m, 13H, Ar-H), 8.24 (s, 1H, NH) ppm; <sup>13</sup>C NMR (DMSO-*d*<sub>6</sub>, 100 MHz): δ 31.2, 47.0, 52.4, 52.8, 65.3 (spiro carbon), 74.3 (spiro carbon), 119.1, 120.8, 126.1,

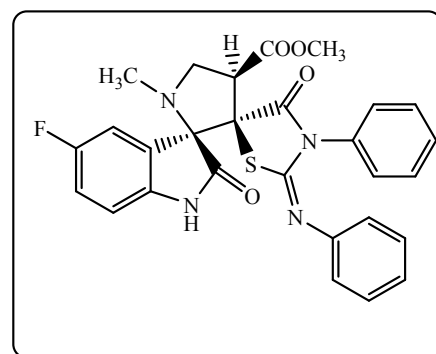

128.2, 129.4, 129.8, 129.9, 130.2, 132.6, 135.0, 138.9, 148.3, 152.4 (aromatic carbons), 169.3, 169.7, 177.2 (three C=O) ppm; MS (m/z): 531.57 [M+H]<sup>+</sup>; Anal. calcd. for C<sub>28</sub>H<sub>23</sub>FN<sub>4</sub>O<sub>4</sub>S : C 63.39; H 4.37; N 10.56 %. Found: C 63.54, H 4.42, N 10.53 %.

**Methyl-5-bromo-1'-methyl-2,4''-dioxo-3''-phenyl-2''-(phenylimino)dispiro[indoline-3,2'-pyrrolidine-3',5''-thiazolidine]-4'-carboxylate (4f):**

<sup>1</sup>H NMR (DMSO-*d*<sub>6</sub>, 400 MHz): δ 2.00 (s, 3H, N-CH<sub>3</sub>), 3.34 (t, 1H, CH, *J* = 8.8, 8 Hz), 3.66 (s, 3H, OCH<sub>3</sub>), 3.72 (t, 1H, CH, *J* = 9.2 Hz), 4.14 (t, 1H, CH, *J* = 8.4, 9.2 Hz), 6.64-7.55 (m, 13H, Ar-H), 10.92 (s, 1H, NH) ppm; <sup>13</sup>C NMR (DMSO-*d*<sub>6</sub>, 100 MHz): δ 35.4, 50.6, 52.6, 53.4, 66.4 (spiro carbon), 79.4 (spiro carbon), 112.6, 114.4, 120.8, 125.1, 128.5, 129.8, 129.9, 130.0, 134.1, 134.9, 143.8, 147.9, 152.6

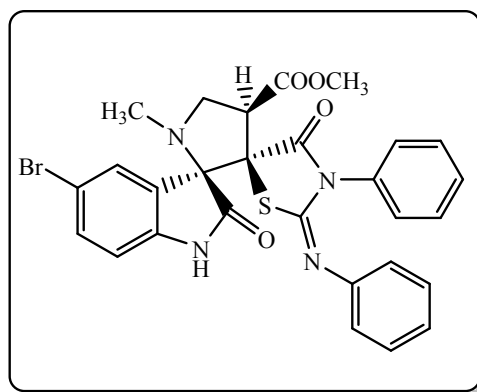

(aromatic carbons), 169.7, 173.3, 175.8 (three C=O) ppm; MS (m/z): 591.48 [M+H]<sup>+</sup>; Anal. calcd. for C<sub>28</sub>H<sub>23</sub>BrN<sub>4</sub>O<sub>4</sub>S : C 56.86; H 3.92; N 9.47 %. Found: C 56.71, H 3.95, N 9.43 %.

**Methyl-1',5,7-trimethyl-2,4''-dioxo-3''-(p-tolyl)-2''-(p-tolylimino)dispiro[indoline-3,2'-pyrrolidine-3',5''-thiazolidine]-4'-carboxylate (4g):**

<sup>1</sup>H NMR (DMSO-*d*<sub>6</sub>, 400 MHz): δ 1.97 (s, 3H, N-CH<sub>3</sub>), 2.14 (s, 3H, CH<sub>3</sub>), 2.16 (s, 3H, CH<sub>3</sub>), 2.18 (s, 3H, CH<sub>3</sub>), 2.20 (s, 3H, CH<sub>3</sub>), 3.63 (s, 3H, OCH<sub>3</sub>), 3.75 (t, 1H, CH, *J* = 8.8, 9.2 Hz), 4.08 (t, 1H, CH, *J* = 8.8, 8.4 Hz), 4.89 (t, 1H, CH, *J* = 7.2 Hz), 6.46-7.23 (m, 10H, Ar-H), 10.64 (s, 1H, NH) ppm; <sup>13</sup>C NMR (DMSO-*d*<sub>6</sub>, 100 MHz): δ 16.6, 16.7, 20.9, 21.2,

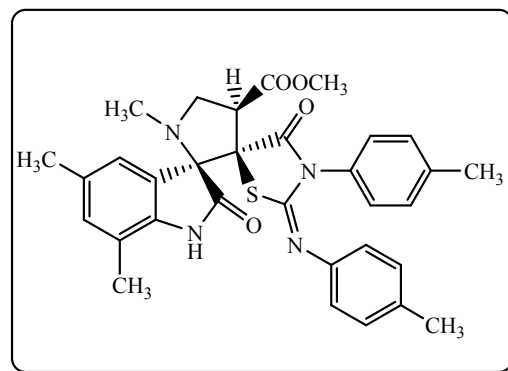

35.5, 49.8, 52.4, 53.5, 66.2 (spiro carbon), 79.8 (spiro carbon), 119.5, 120.7, 123.1, 128.2, 130.0, 132.4, 132.9, 134.2, 138.9, 140.6, 145.7, 152.8, 152.9 (aromatic carbons), 170.1, 173.4, 176.8 (three C=O) ppm; MS (m/z): 569.21 [M+H]<sup>+</sup>; Anal. calcd. for C<sub>32</sub>H<sub>32</sub>N<sub>4</sub>O<sub>4</sub>S : C 67.59; H 5.67; N 9.85 %. Found: C 67.39, H 5.62, N 9.89 %.

**Methyl-3''-(4-bromophenyl)-2''-(4-bromophenyl)imino)-1',5-dimethyl-2,4''-dioxodispiro[indoline-3,2'-pyrrolidine-3',5''-thiazolidine]-4'-carboxylate (4h):**

$^1\text{H}$  NMR (DMSO- $d_6$ , 400 MHz):  $\delta$  2.16 (s, 3H, N-CH $_3$ ), 2.26 (s, 3H, CH $_3$ ), 3.44 (t, 1H, CH,  $J$  = 7.2, 9.2 Hz), 3.68 (s, 3H, OCH $_3$ ), 4.36 (t, 1H, CH,  $J$  = 6.4, 6 Hz), 4.92 (t, 1H, CH,  $J$  = 7.2, 7.6 Hz), 6.55-7.76 (m, 11H, Ar-H), 10.47 (s, 1H, NH) ppm;  $^{13}\text{C}$  NMR (DMSO- $d_6$ , 100 MHz):  $\delta$  21.3, 36.0, 48.5, 51.1, 52.9, 64.9 (spiro carbon), 79.6 (spiro carbon), 110.0,

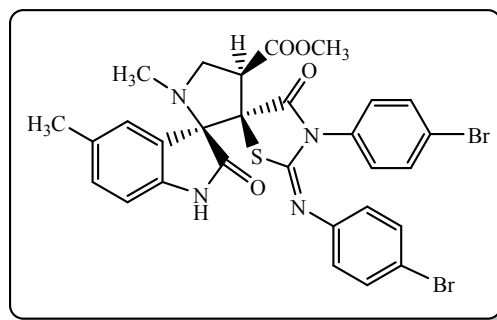

110.7, 117.5, 123.2, 126.5, 130.3, 130.5, 131.7, 132.7, 132.9, 141.9, 147.0, 147.4, 153.1, 153.4 (aromatic carbons), 169.9, 171.3, 176.7 (three C=O) ppm; MS (m/z): 682.99 [M+H] $^+$ ; Anal. calcd. for C $_{29}$ H $_{24}$ Br $_2$ N $_4$ O $_4$ S : C 50.89; H 3.53; N 8.19 %. Found: C 50.69, H 3.58, N 8.16 %

**Methyl-3''-(4-fluorophenyl)-2''-(4-fluorophenyl)imino)-1',5-dimethyl-2,4''-dioxodispiro[indoline-3,2'-pyrrolidine-3',5''-thiazolidine]-4'-carboxylate (4i):**

$^1\text{H}$  NMR (DMSO- $d_6$ , 400 MHz):  $\delta$  1.98 (s, 3H, N-CH $_3$ ), 2.18 (s, 3H, CH $_3$ ), 3.32 (t, 1H, CH,  $J$  = 7.6, 9.2 Hz), 3.65 (s, 3H, OCH $_3$ ), 3.75 (t, 1H, CH,  $J$  = 9.2 Hz), 4.13 (t, 1H, CH,  $J$  = 8.8 Hz), 6.61-7.45 (m, 11H, Ar-H), 10.63 (s, 1H, NH) ppm;  $^{13}\text{C}$  NMR (DMSO- $d_6$ , 100 MHz):  $\delta$  21.2, 35.8, 50.2, 52.5, 53.50, 66.4 (spiro carbon), 79.6 (spiro carbon), 110.2, 120.9, 124.0, 127.9, 128.5, 129.6, 129.8, 131.5, 142.0, 148.0, 152.9

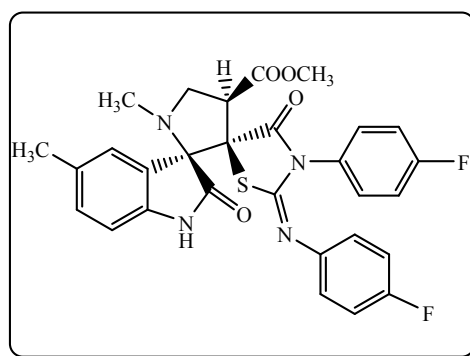

(aromatic carbons), 169.9, 173.4, 176.2 (three C=O) ppm; MS (m/z): 563.15 [M+H] $^+$ ; Anal. calcd. for C $_{29}$ H $_{24}$ F $_2$ N $_4$ O $_4$ S : C 61.91; H 4.30; N 9.96 %. Found: C 61.76, H 4.35, N 9.93%.

**Methyl-3''-(4-chlorophenyl)-2''-(4-chlorophenyl)imino)-5-fluoro-1'-methyl-2,4''-dioxodispiro[indoline-3,2'-pyrrolidine-3',5''-thiazolidine]-4'-carboxylate (4j):**

$^1\text{H}$  NMR (DMSO- $d_6$ , 400 MHz):  $\delta$  2.02 (s, 3H, N-CH $_3$ ), 3.45 (t, 1H, CH,  $J$  = 7.2, 9.2 Hz), 3.69 (s, 3H, OCH $_3$ ), 4.38 (t, 1H, CH,  $J$  = 6.4 Hz), 4.93 (t, 1H, CH,  $J$  = 7.2, 7.6 Hz), 6.62 - 7.62 (m, 11H, Ar-H), 10.64 (s, 1H, NH) ppm;  $^{13}\text{C}$  NMR (DMSO- $d_6$ , 100 MHz):  $\delta$  36.0, 48.9, 52.7, 53.0, 64.9 (spiro carbon), 78.9 (spiro carbon), 112.1, 113.3, 118.1, 118.4, 122.7, 129.8, 130.0, 133.6, 134.3, 140.5, 146.5, 152.9, 153.1 (aromatic carbons), 169.8, 171.3, 176.8 (three C=O) ppm; MS (m/z): 599.06

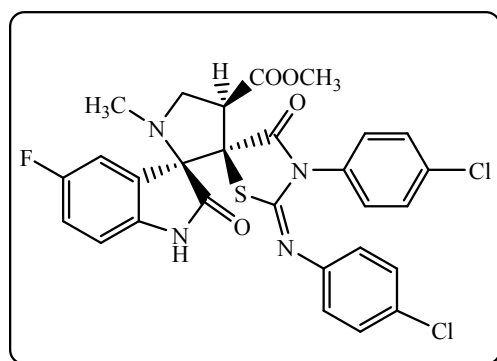

[M+H]<sup>+</sup>; Anal. calcd. for C<sub>28</sub>H<sub>21</sub>Cl<sub>2</sub>N<sub>4</sub>O<sub>4</sub>S : C 56.10; H 3.53; N 9.35 %. Found: C 56.25, H 3.58, N 9.38 %.

**Methyl-3''-(4-chlorophenyl)-2''-(4-chlorophenyl)imino)-5-bromo-1'-methyl-2,4''-dioxodispiro[indoline-3,2'-pyrrolidine-3',5''-thiazolidine]-4'-carboxylate (4k):**

<sup>1</sup>H NMR (DMSO-*d*<sub>6</sub>, 400 MHz): δ 1.97 (s, 3H, N-CH<sub>3</sub>), 3.56 (t, 1H, CH, *J* = 8.8 Hz), 3.78 (s, 3H, OCH<sub>3</sub>), 4.22 (t, 1H, CH, *J* = 8.4 Hz), 4.72 (t, 1H, CH, *J* = 7.2, 8.4 Hz), 7.08-7.76 (m, 11H, Ar-H), 10.47 (s, 1H, NH) ppm; <sup>13</sup>C NMR (DMSO-*d*<sub>6</sub>, 100 MHz): δ 36.8, 50.5, 52.7, 53.2, 66.2 (spiro carbon), 74.2 (spiro carbon), 110.8, 120.5, 125.1, 127.8, 129.5, 134.5, 137.2, 143.8, 157.2,

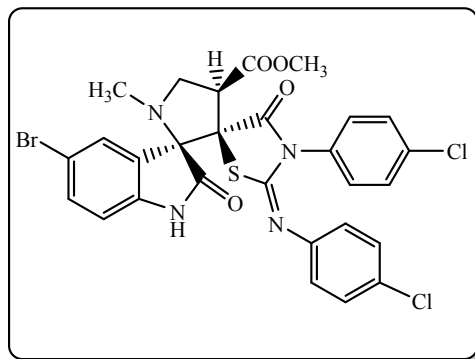

159.6, (aromatic carbon), 169.0, 173.4, 177.8 (three C=O) ppm; MS (m/z): 659.98 [M+H]<sup>+</sup>; Anal. calcd. for C<sub>28</sub>H<sub>21</sub>BrCl<sub>2</sub>N<sub>4</sub>O<sub>4</sub>S : C 50.93; H 3.21; N 8.48 %. Found: C 50.77, H 3.26, N 8.45 %.

**Methyl-3''-(4-chlorophenyl)-2''-(4-chlorophenyl)imino)-1',5,7-trimethyl-2,4''-dioxodispiro[indoline-3,2'-pyrrolidine-3',5''-thiazolidine]-4'-carboxylate (4l):**

<sup>1</sup>H NMR (DMSO-*d*<sub>6</sub>, 400 MHz): δ 1.98 (s, 3H, N-CH<sub>3</sub>), 2.12 (s, 3H, CH<sub>3</sub>), 2.17 (s, 3H, CH<sub>3</sub>), 3.68 (s, 3H, OCH<sub>3</sub>), 3.74 (t, 1H, CH, *J* = 8.8 Hz), 4.11 (t, 1H, CH, *J* = 8.4 Hz), 4.93 (t, 1H, CH, *J* = 7.2 Hz), 6.61-7.30 (m, 10H, Ar-H), 10.69 (s, 1H, NH) ppm; <sup>13</sup>C NMR (DMSO-*d*<sub>6</sub>, 100 MHz): δ 16.7, 21.1, 35.5, 49.5, 52.5,

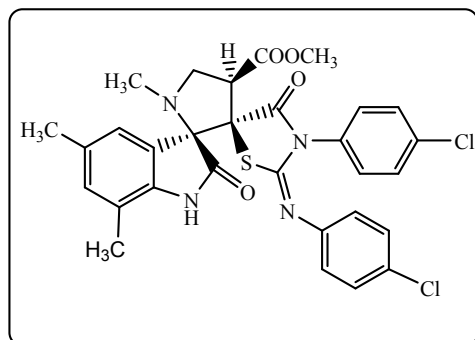

53.7, 66.3 (spiro carbon), 79.8 (spiro carbon), 116.4, 116.6, 119.6, 122.5, 122.6, 124.9, 126.0, 130.7, 133.0, 140.6, 144.4, 153.8, 158.4, 160.9 (aromatic carbons), 170.0, 173.2, 176.8 (three C=O) ppm; MS (m/z): 609.11 [M+H]<sup>+</sup>; Anal. calcd. for C<sub>30</sub>H<sub>26</sub>Cl<sub>2</sub>N<sub>4</sub>O<sub>4</sub>S : C 59.12; H 4.30; N 9.19 %. Found: C 59.27, H 4.35, N 9.16 %.

**Methyl-1'-methyl-1,3,4''-trioxo-3''-phenyl-2''-(phenylimino)-1,3-dihydrodispiro[indene-2,2'-pyrrolidine-3',5''-thiazolidine]-4'-carboxylate (7a):**

<sup>1</sup>H NMR (CDCl<sub>3</sub>, 400 MHz): δ 2.31 (s, 3H, N-CH<sub>3</sub>), 3.53 (t, 1H, CH, *J* = 9.2 Hz), 3.74 (t, 1H, CH, *J* = 7.2, 8.4 Hz), 3.76 (s, 3H, OCH<sub>3</sub>), 4.69 (t, 1H, CH, *J* = 7.6, 8 Hz), 6.84 – 8.02 (m, 14H, Ar-H) ppm; <sup>13</sup>C NMR (CDCl<sub>3</sub>, 100 MHz): δ 35.5, 51.8, 52.6, 52.8, 69.0 (spiro carbon), 79.92 (spiro

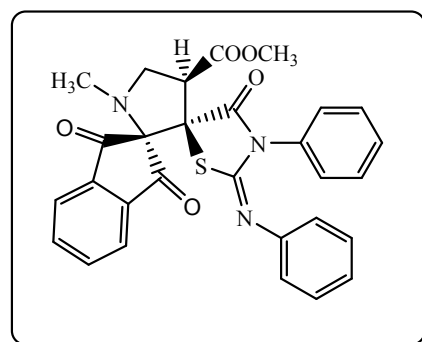

carbon), 120.9, 123.4, 123.6, 124.9, 127.4, 129.08, 129.3, 129.3, 136.0, 137.3, 147.5 (aromatic carbons), 168.8, 170.1, 194.4, 198.1 (four C=O) ppm; MS (m/z): 526.14 [M+H]<sup>+</sup>; Anal. calcd. for C<sub>29</sub>H<sub>23</sub>N<sub>3</sub>O<sub>5</sub>S : C 66.27; H, 4.41; N, 8.00%. Found: C 66.42, H 4.46, N 8.03 %.

**Methyl-1'-methyl-1,3,4''-trioxo-3''-(4-(trifluoromethyl)phenyl)-2''-(4-(trifluoromethyl)phenyl)imino)-1,3-dihydrodispiro[indene-2,2'-pyrrolidine-3',5''-thiazolidine]-4'-carboxylate (7b):**

<sup>1</sup>H NMR (CDCl<sub>3</sub>, 400 MHz): δ 2.26 (s, 3H, N-CH<sub>3</sub>), 3.11 (t, 1H, CH, *J* = 7.2, 9.2 Hz), 3.30 (t, 1H, CH, *J* = 6.4 Hz), 3.43 (s, 3H, OCH<sub>3</sub>), 4.27 (t, 1H, CH, *J* = 7.6 Hz), 6.82 – 8.18 (m, 12H, Ar-H) ppm; <sup>13</sup>C NMR (CDCl<sub>3</sub>, 100 MHz): δ 35.6, 51.1, 52.3, 52.5, 69.2 (spiro carbon), 79.9 (spiro carbon), 120.9, 121.9, 124.7, 127.7, 128.8, 129.0, 129.2, 129.9, 129.9, 130.5, 130.8, 144.4, 152.4, 153.9, 161.0 (aromatic carbons), 172.1, 174.2, 192.6, 196.5 (four C=O) ppm; MS (m/z): 662.11

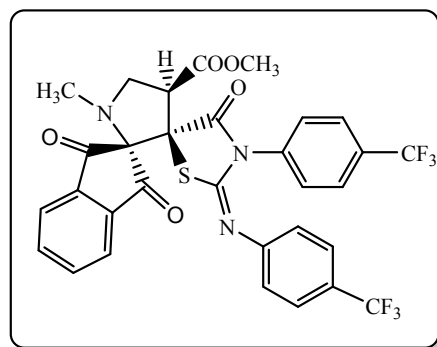

[M+H]<sup>+</sup>; Anal. calcd. for C<sub>31</sub>H<sub>21</sub>F<sub>6</sub>N<sub>3</sub>O<sub>5</sub>S : C 56.28; H, 3.20; N, 6.35%. Found: C 56.43, H 3.25, N 6.32 %.

**Methyl-3''-(4-chlorophenyl)-2''-(4-chlorophenyl)imino)-1'-methyl-1,3,4''-trioxo-1,3-dihydrodispiro[indene-2,2'-pyrrolidine-3',5''-thiazolidine]-4'-carboxylate (7c):**

<sup>1</sup>H NMR (DMSO-*d*<sub>6</sub>, 400 MHz): δ 2.17 (s, 3H, N-CH<sub>3</sub>), 3.64 (s, 3H, OCH<sub>3</sub>), 3.75 (t, 1H, CH, *J* = 8 Hz), 4.10 (t, 1H, CH, *J* = 7.4 Hz), 4.72 (t, 1H, CH, *J* = 8.6, 9.2 Hz), 6.54 – 8.32 (m, 12H, Ar-H) ppm; <sup>13</sup>C NMR (DMSO-*d*<sub>6</sub>, 100 MHz): δ 35.8, 50.8, 54.5, 55.2, 67.2 (spiro carbon), 75.2 (spiro carbon), 121.9, 124.1, 127.1, 128.2, 129.5, 129.6, 130.5, 133.3, 136.7, 140.3, 156.8 (aromatic carbons), 172.1, 174.2, 192.6,

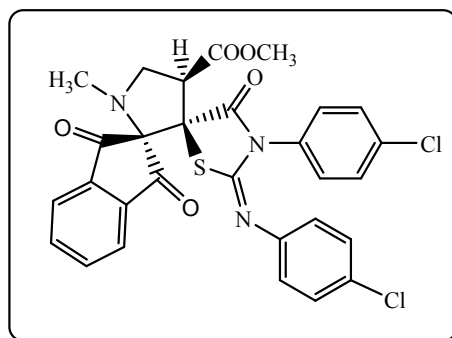

196.8 (four C=O) ppm; MS (m/z): 595.46 [M+H]<sup>+</sup>; Anal. calcd. for C<sub>29</sub>H<sub>21</sub>Cl<sub>2</sub>N<sub>3</sub>O<sub>5</sub>S : C 58.59; H, 3.56; N, 7.07%. Found: C 58.34, H 3.51, N 7.05 %.

**Methyl-3''-(4-fluorophenyl)-2''-(4-fluorophenyl)imino)-1'-methyl-1,3,4''-trioxo-1,3-dihydrodispiro[indene-2,2'-pyrrolidine-3',5''-thiazolidine]-4'-carboxylate (7d):**

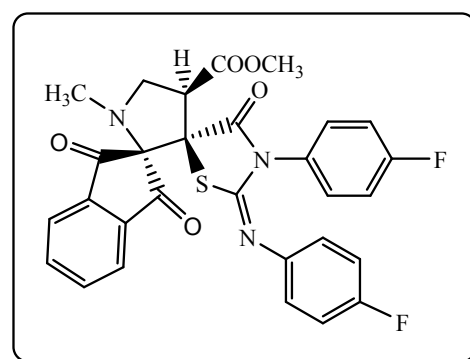

<sup>1</sup>H NMR (CDCl<sub>3</sub>, 400 MHz): δ 1.61 (s, 3H, N-CH<sub>3</sub>), 3.79 (s, 3H, OCH<sub>3</sub>), 4.03 (t, 1H, CH, *J* = 7.4 Hz), 4.23 (t, 1H, CH, *J* = 7.4 Hz), 5.11 (t, 1H, CH, *J* = 7.6 Hz), 6.76 – 7.67 (m, 12H, Ar-H) ppm; <sup>13</sup>C NMR (DMSO-*d*<sub>6</sub>, 100 MHz): δ 34.5, 51.1, 52.2, 58.5, 66.8 (spiro carbon), 71.8 (spiro carbon), 110.0, 111.1, 117.5, 117.8, 122.5, 126.5, 126.6, 129.6, 130.0, 133.4, 134.2, 139.2, 146.8, 152.7 (aromatic carbons), 170.9, 172.0, 192.4, 197.6 (four C=O) ppm; MS (m/z): 562.12 [M+H]<sup>+</sup>; Anal. calcd. for C<sub>29</sub>H<sub>21</sub>F<sub>2</sub>N<sub>3</sub>O<sub>5</sub>S : C 62.03; H, 3.77; N, 7.48%. Found: C 62.27, H 3.72, N 7.45 %.

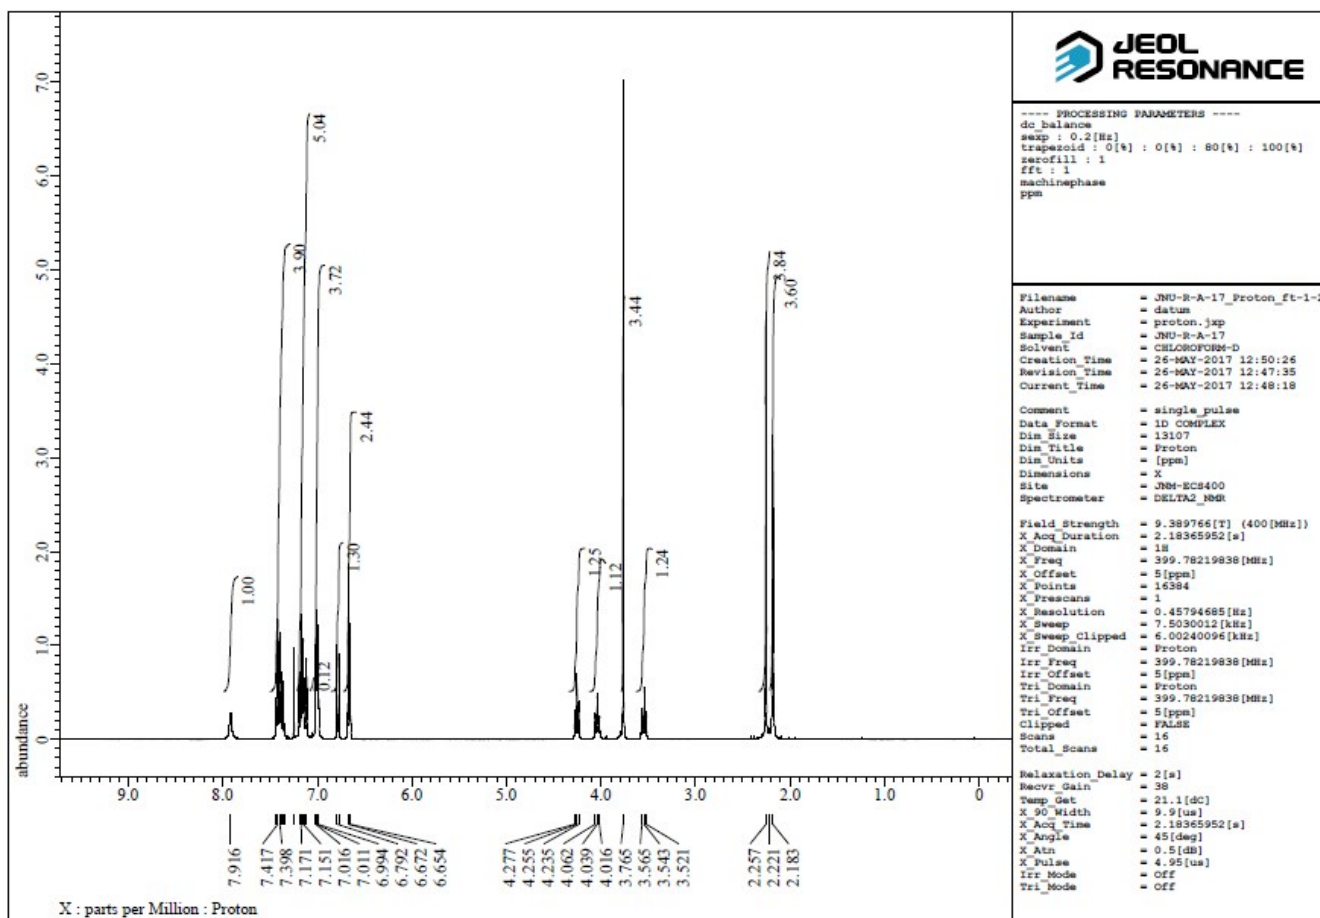

S-1: <sup>1</sup>H-NMR of 4a



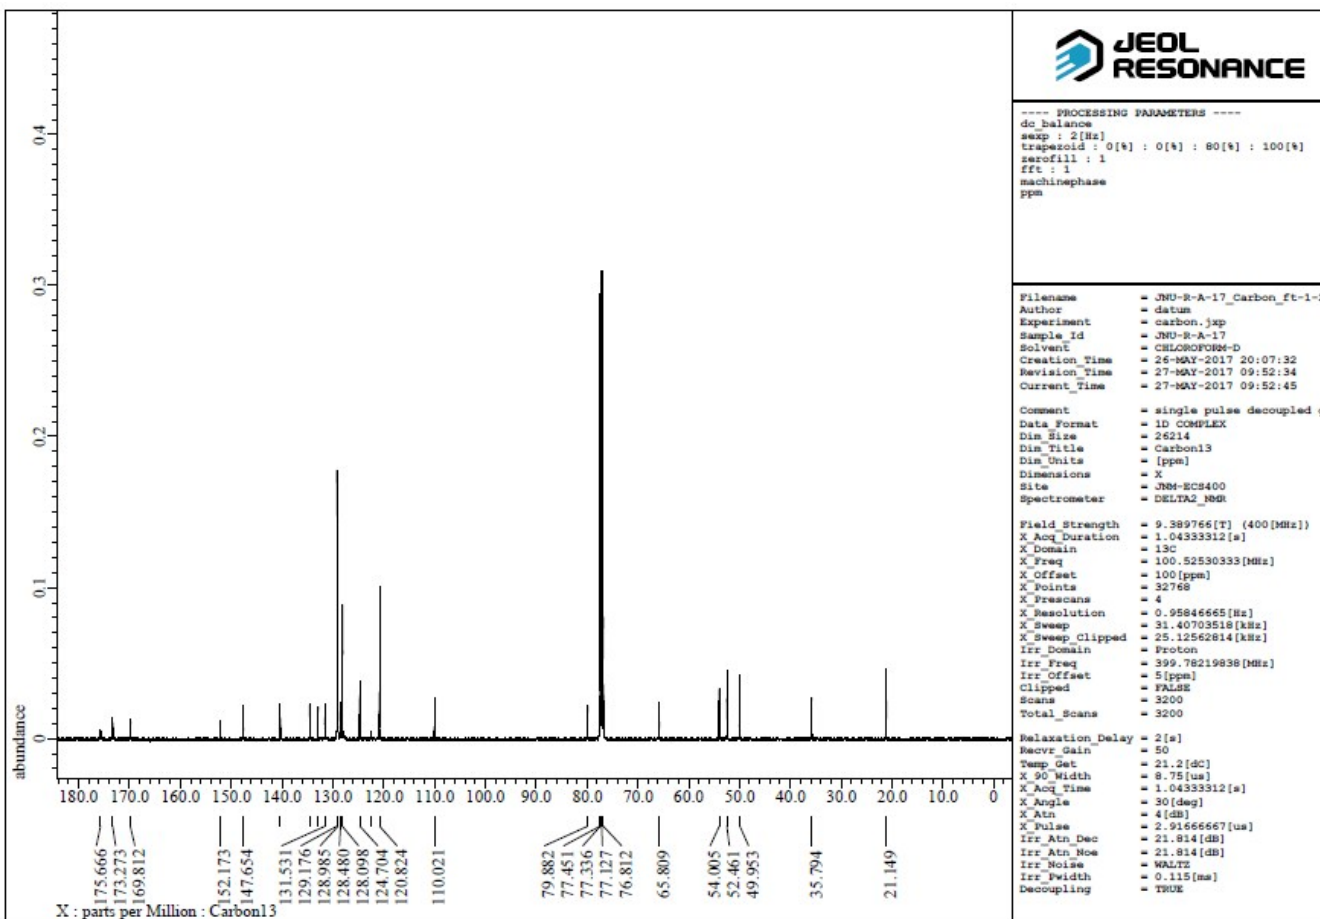

S-2: <sup>13</sup>C-NMR of 4a

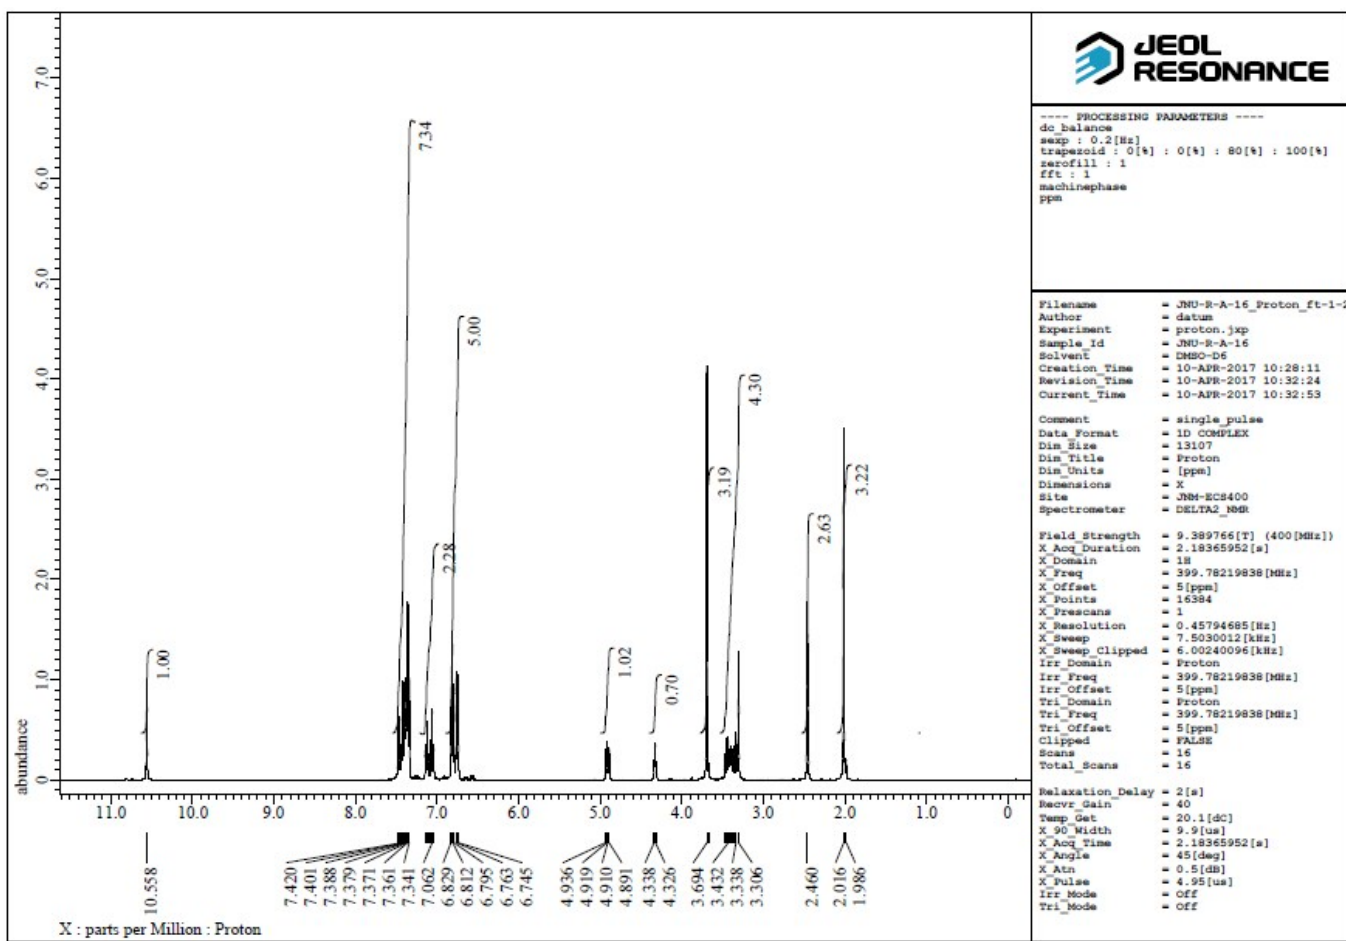

S-3: <sup>1</sup>H-NMR of 4b

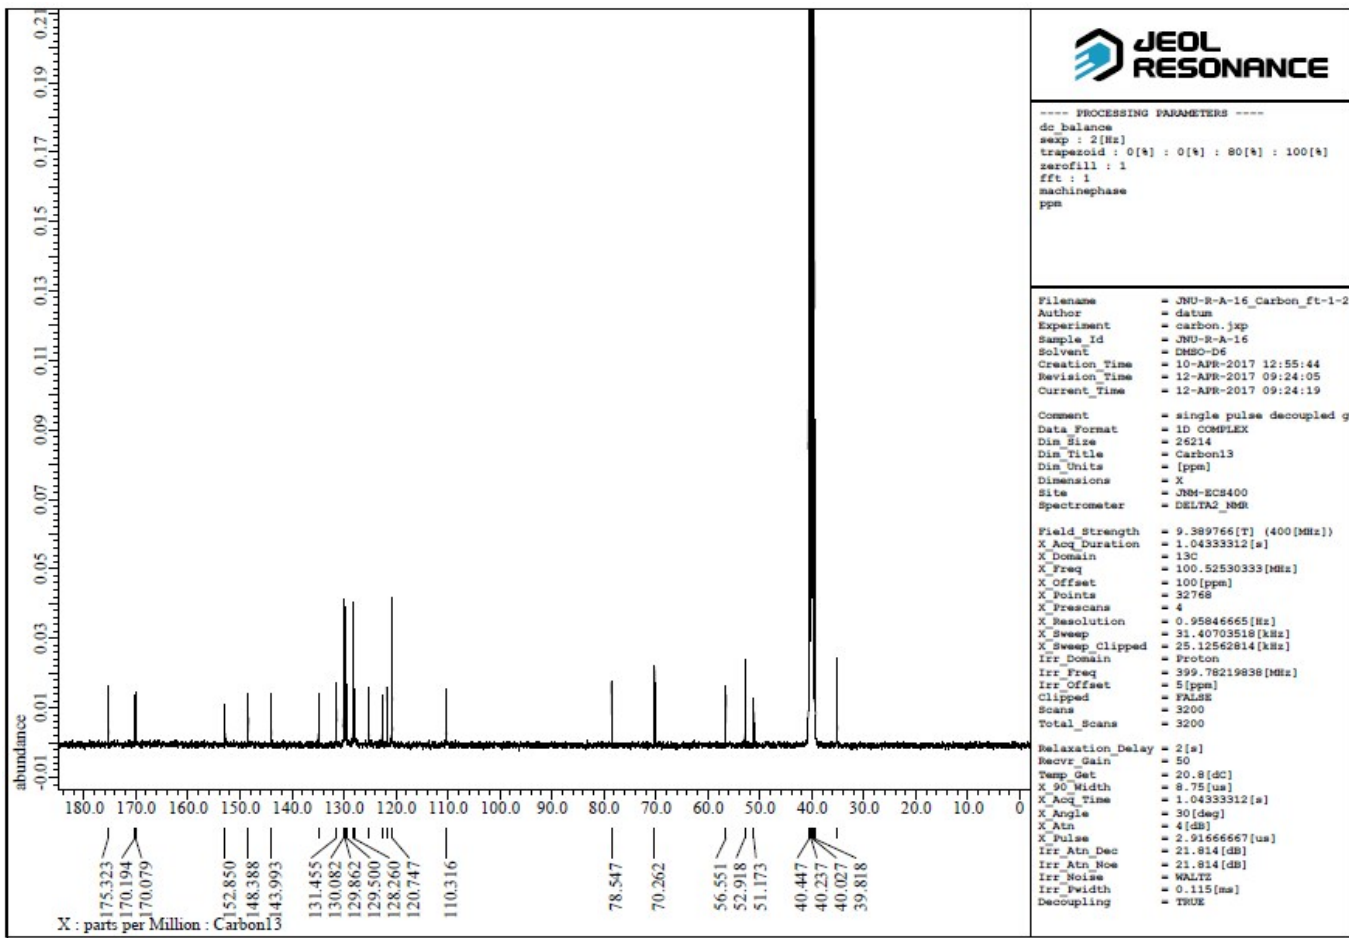

S-4:  $^{13}\text{C}$ -NMR of 4b

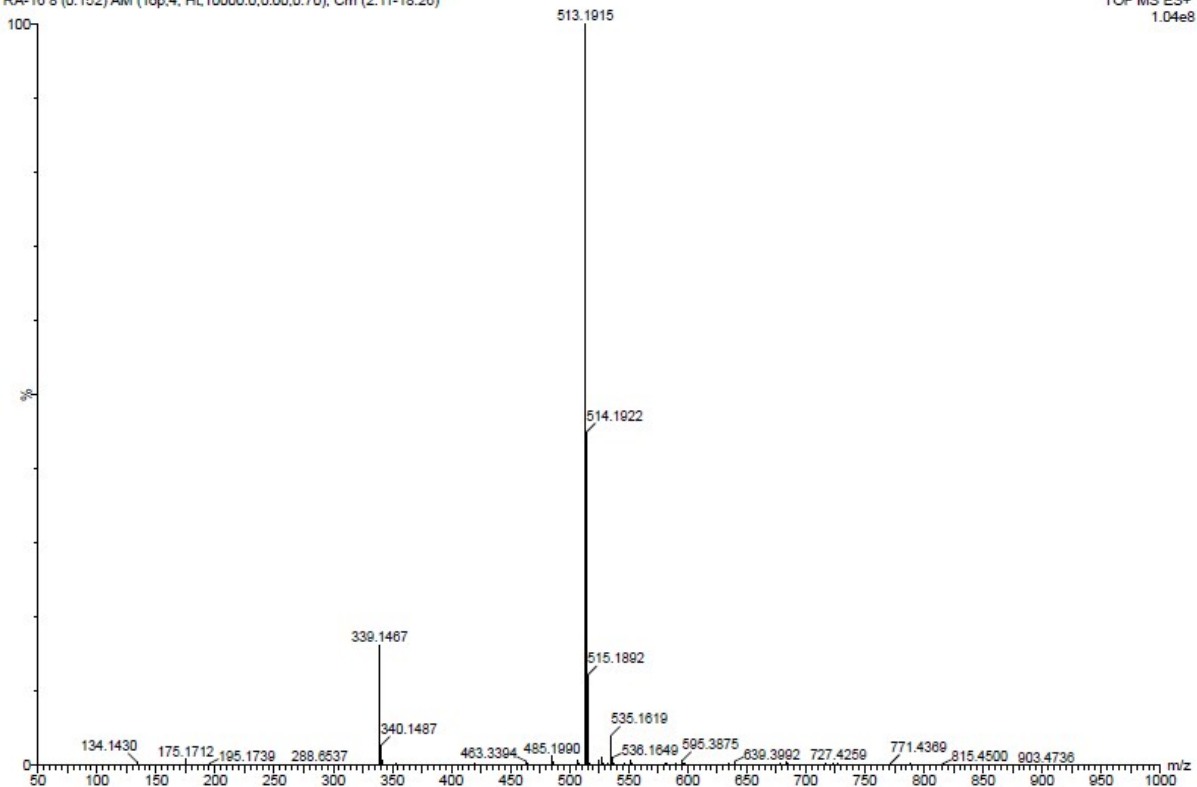

S-5: Mass spectrum of 4b

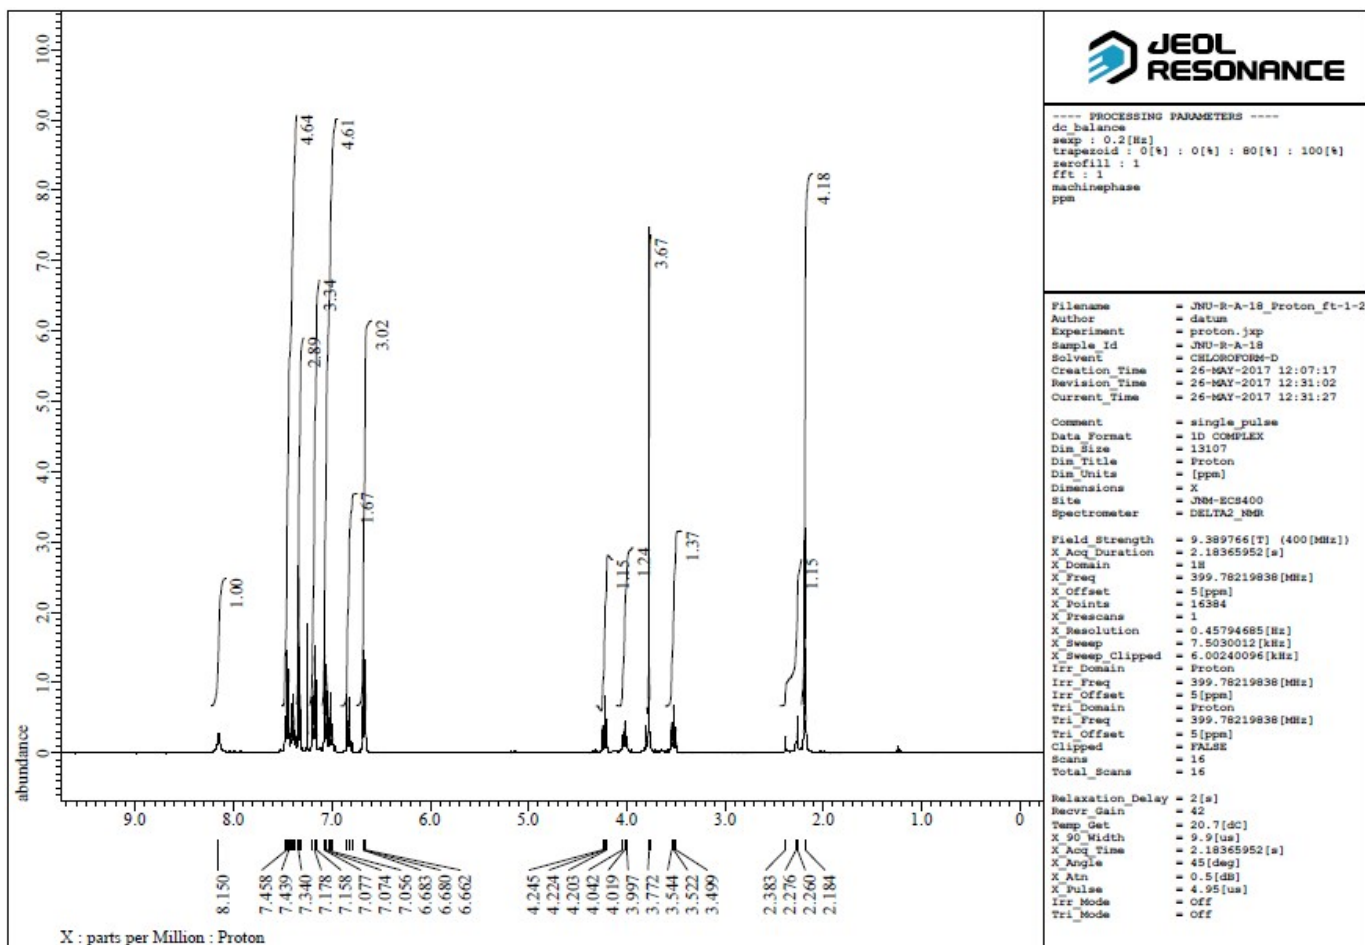

S-6:  $^1\text{H-NMR}$  of 4c

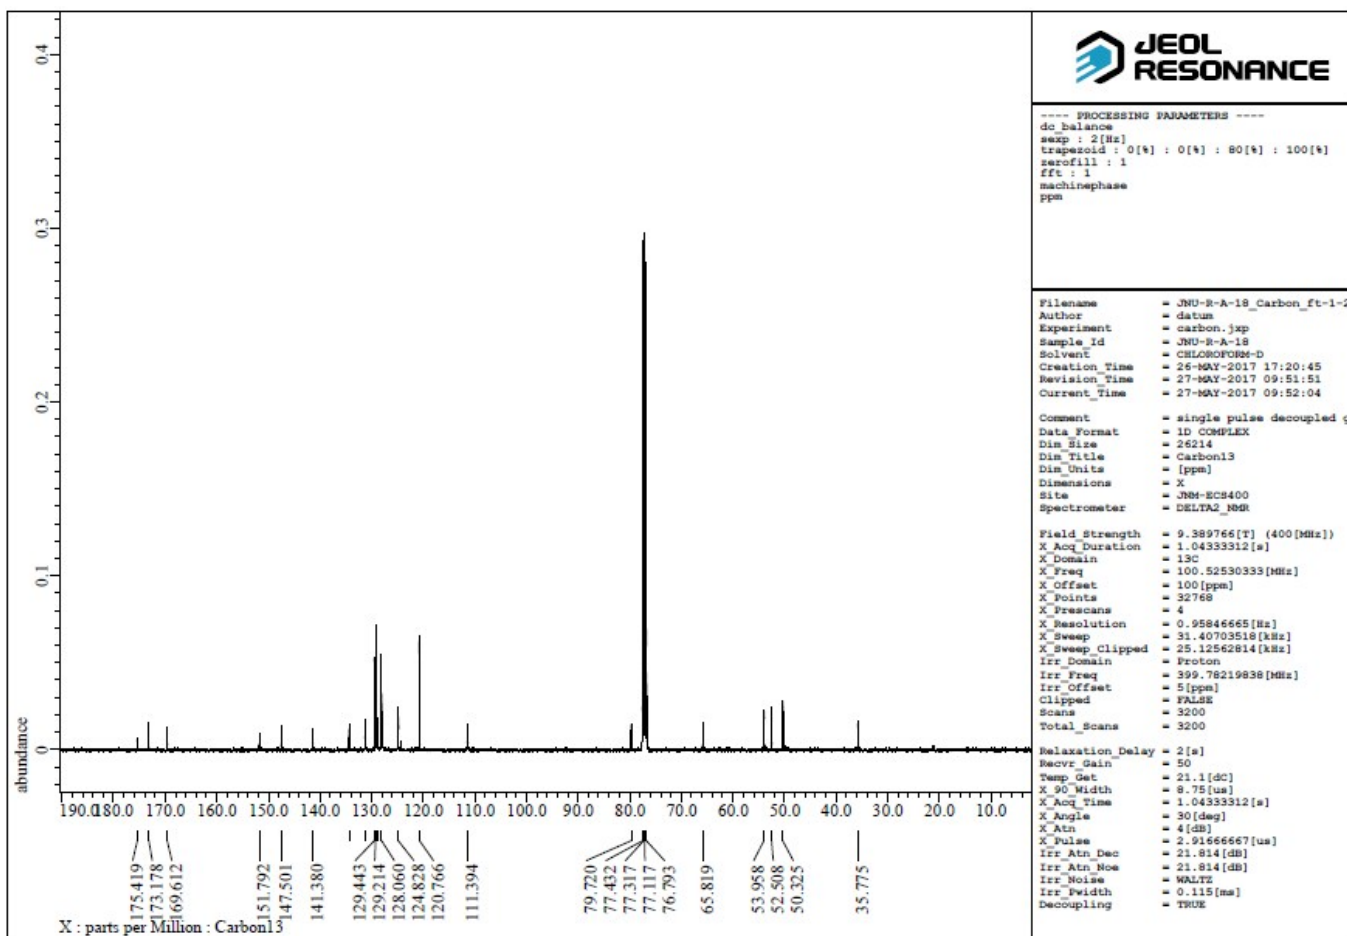

S-7:  $^{13}\text{C}$ -NMR of 4c

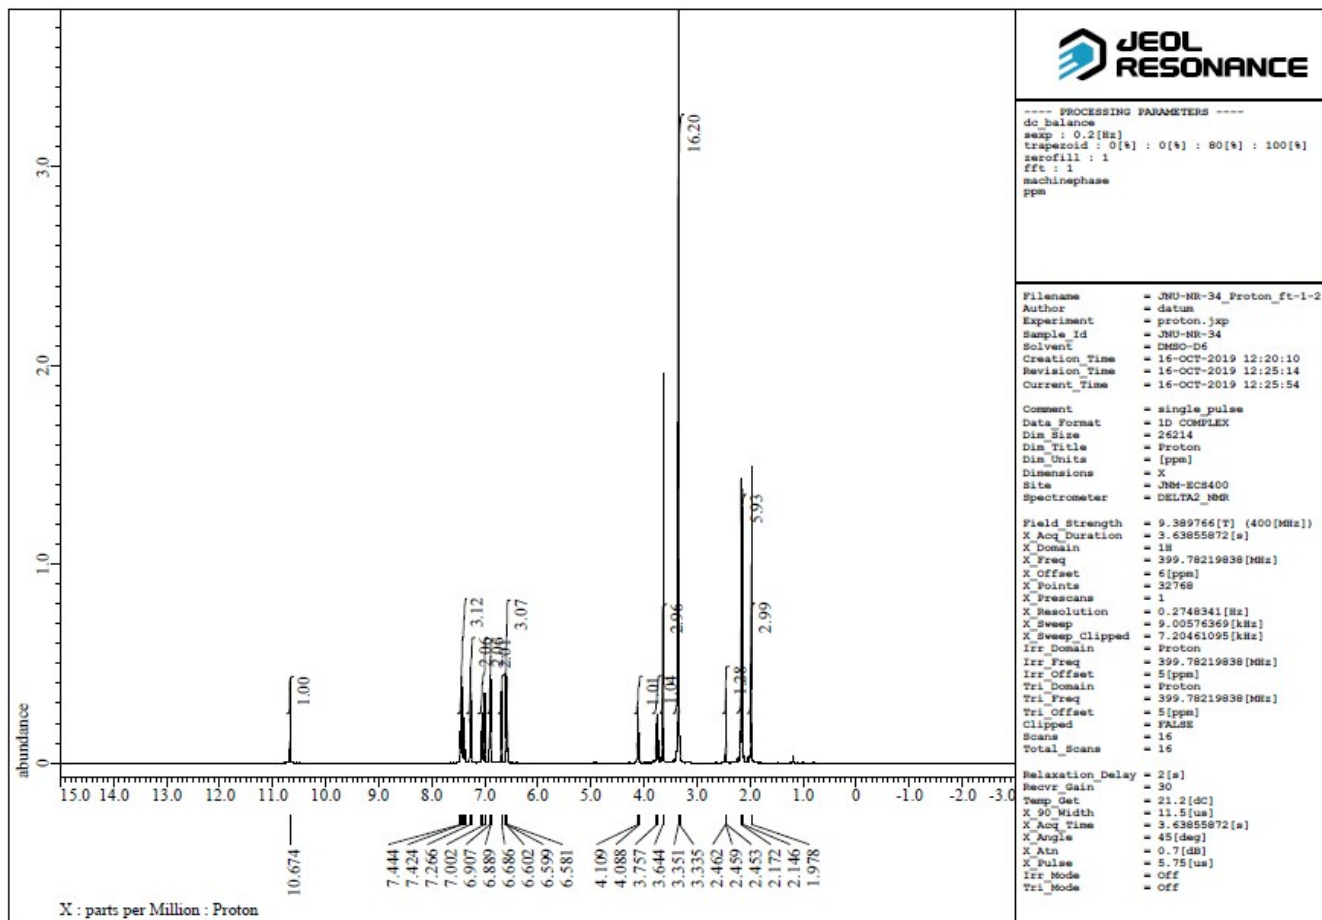S-8:  $^1\text{H}$ -NMR of 4d

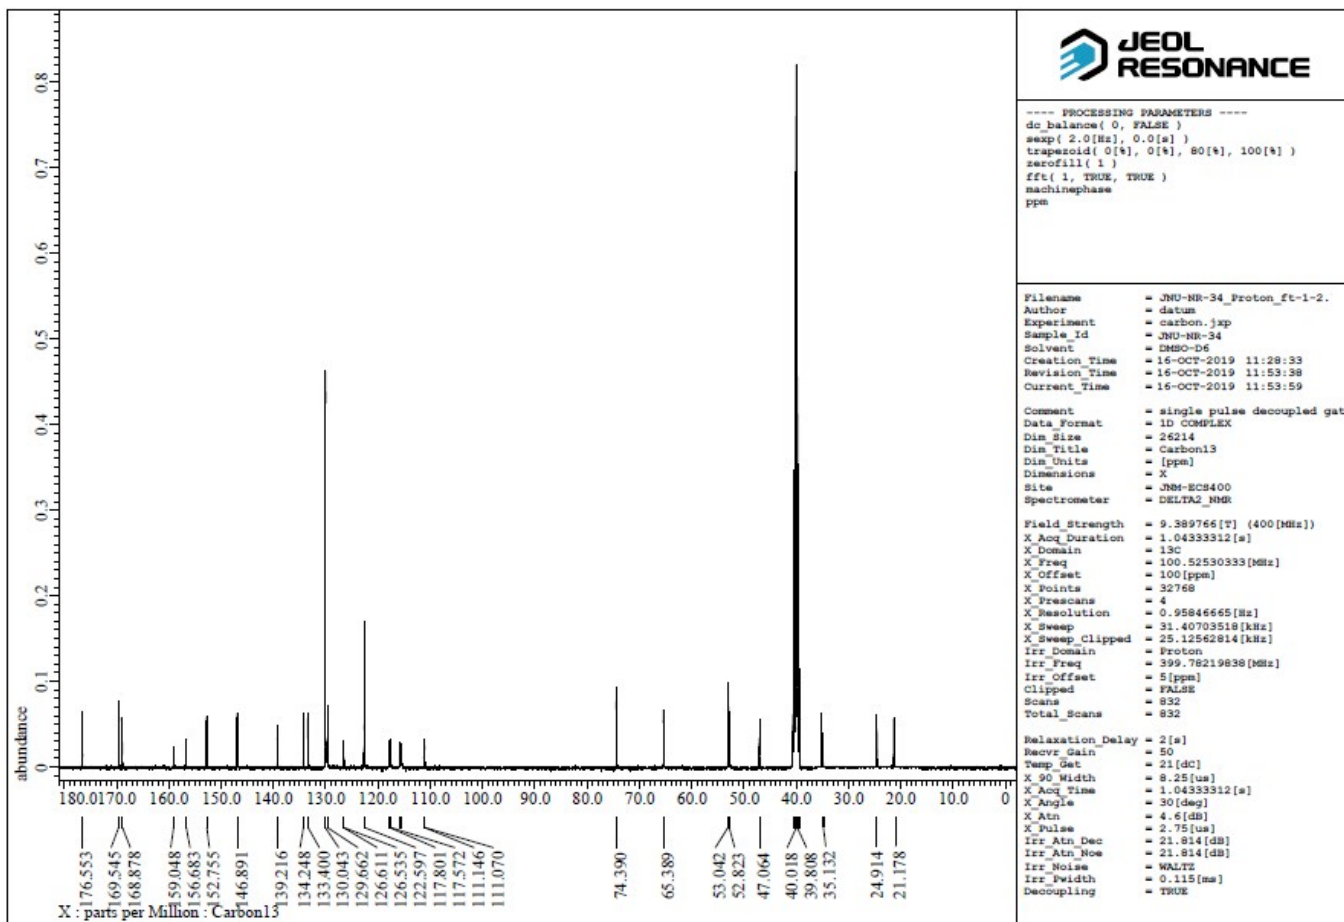

S-9: <sup>13</sup>C-NMR of 4d



CA-1 12 (0.220) AM (Cen,4, 80.00, Ht,10000.0,0.00,0.00); Cm (7:19-48:56)

TOF MS ES+  
1.10e8

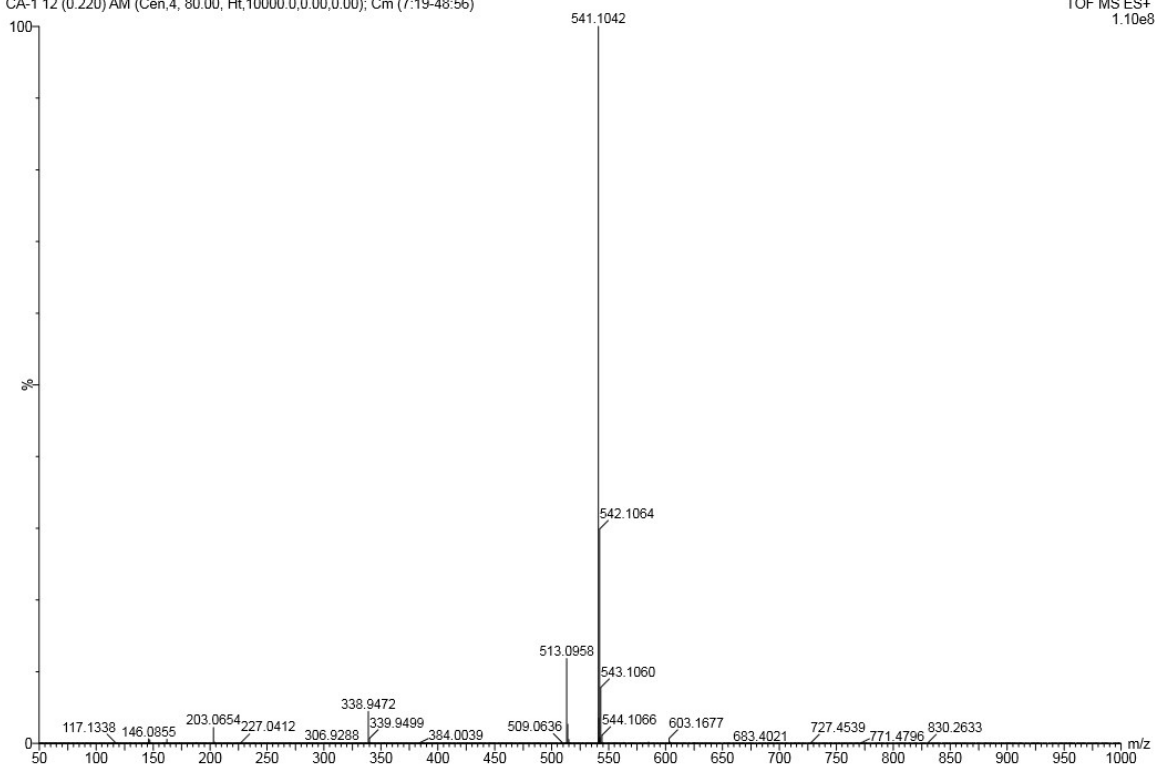

**S-10: Mass spectrum of 4d**

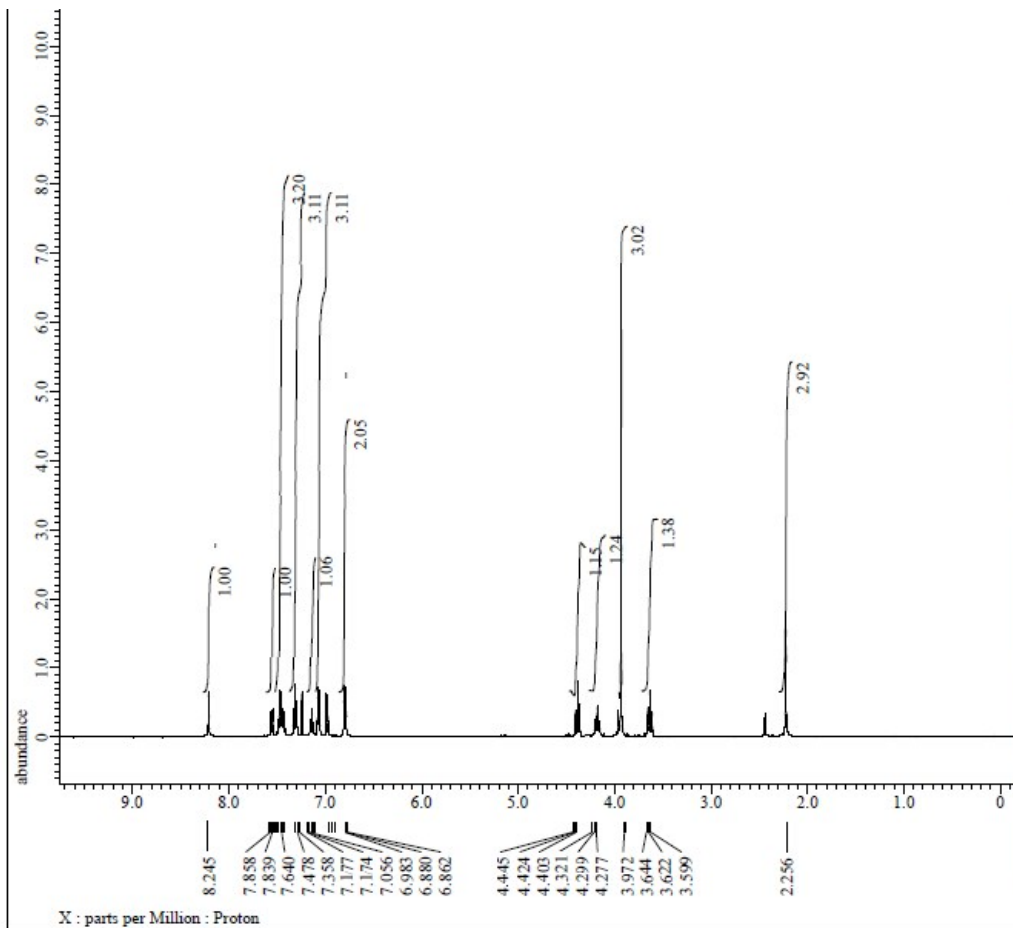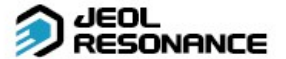

```

---- PROCESSING PARAMETERS ----
do balance
aexp : 0.2[Hz]
trapezoid : 0[%] : 0[%] : 80[%] : 100[%]
zerofill : 1
fft : 1
machinphase
ppm
  
```

```

Filename      = JNU-NR-7_proton_ft-1-2.j
Author       = datum
Experiment   = proton.jxp
Sample Id    = JNU-NR-7
Solvent      = DMSO-D6
Creation Time = 6-AUG-2018 12:07:17
Revision Time = 6-AUG-2018 12:31:02
Current Time  = 6-AUG-2018 12:31:27

Comment      = single_pulse
Data Format   = 1D COMPLEX
Dim Size     = 13107
Dim Title    = Proton
Dim Units    = [ppm]
Dimensions   = X
Site         = JNM-ECS400
Spectrometer = DELTA2_NMR

Field Strength = 9.399766[T] (400[MHz])
X_Acq_Duration = 2.18365952[s]
X_Domain       = 1H
X_Freq        = 399.78219838[MHz]
X_Offset      = 5[ppm]
X_Points      = 16384
X_Prescans    = 1
X_Resolution  = 0.45794685[Hz]
X_Sweep       = 7.5030012[kHz]
X_Sweep_Clipped = 6.00240096[kHz]
Irr_Domain    = Proton
Irr_Freq     = 399.78219838[MHz]
Irr_Offset   = 5[ppm]
Tri_Domain    = Proton
Tri_Freq     = 399.78219838[MHz]
Tri_Offset   = 5[ppm]
Clipped      = FALSE
Scans        = 16
Total Scans  = 16

Relaxation_Delay = 2[s]
Recvr_Gain       = 42
Temp_Gat         = 20.7[degC]
X_90_Width      = 9.9[us]
X_Acq_Time      = 2.18365952[s]
X_Angle         = 45[deg]
X_Atn           = 0.5[dB]
X_Pulse         = 4.95[us]
Irr_Mode        = Off
Tri_Mode        = Off
  
```

X : parts per Million : Proton

S-11: <sup>1</sup>H-NMR of 4e

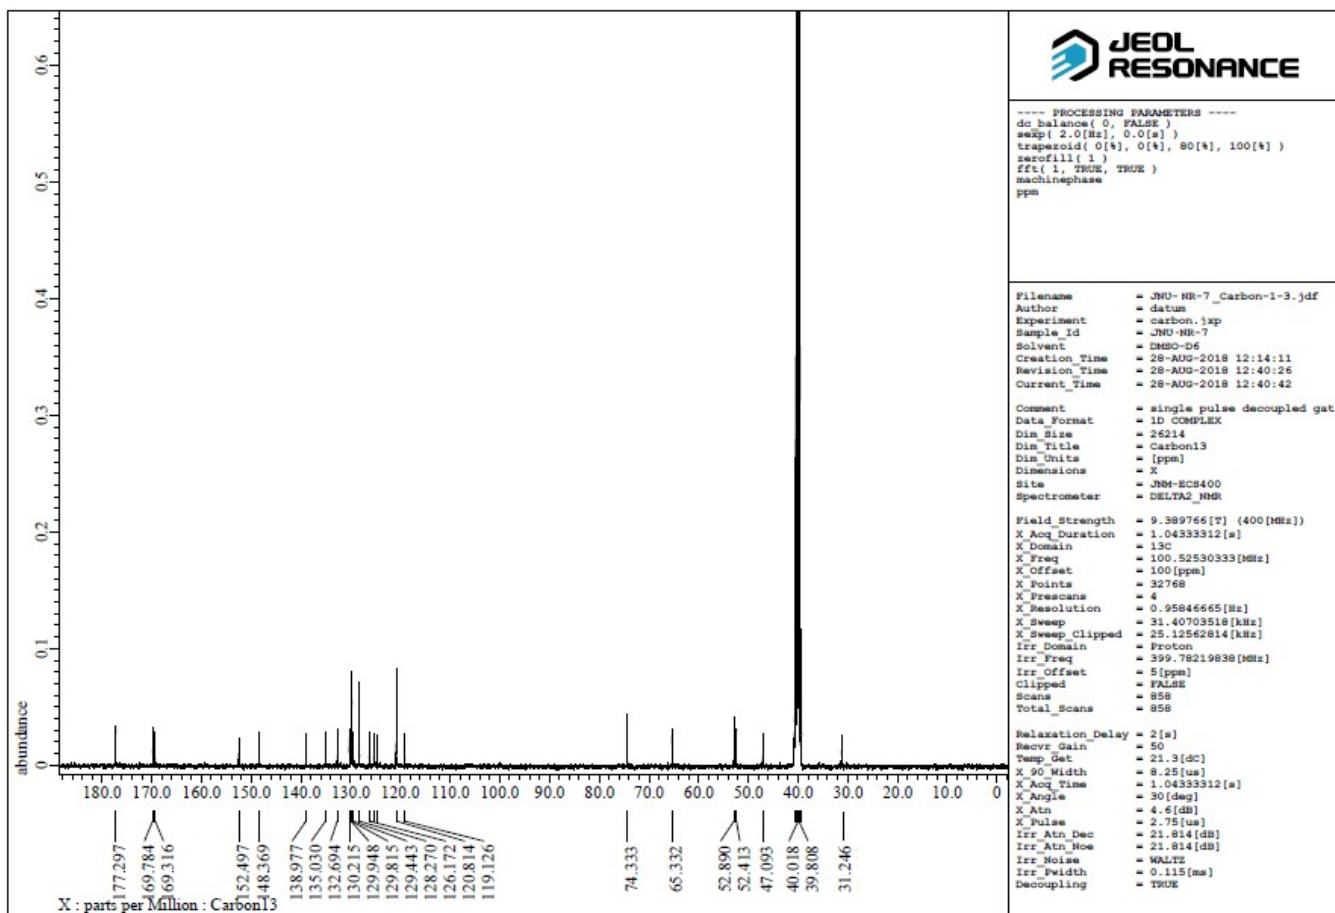

S-12: <sup>13</sup>C-NMR of 4e

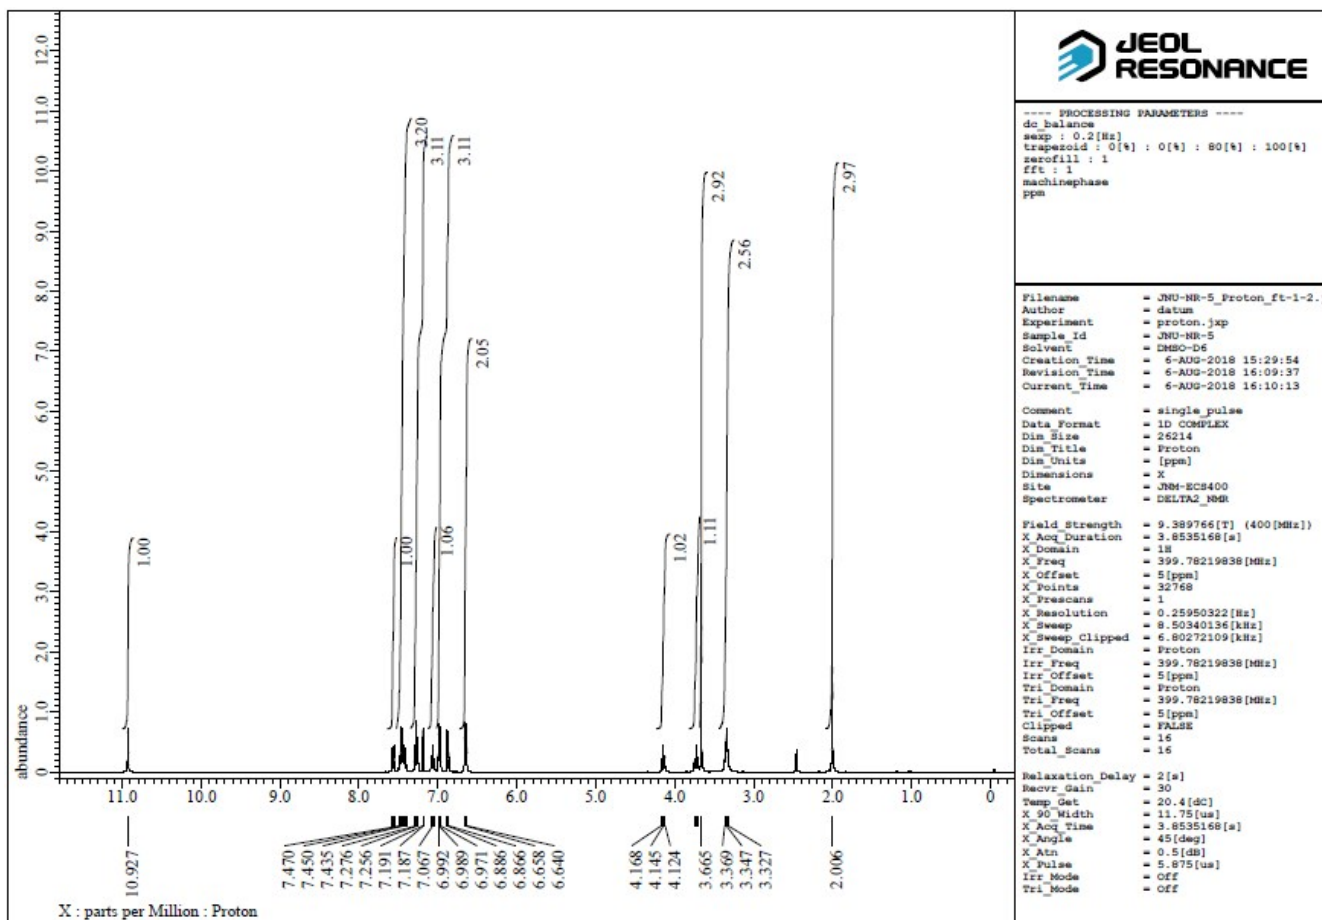

S-13: <sup>1</sup>H-NMR of 4f

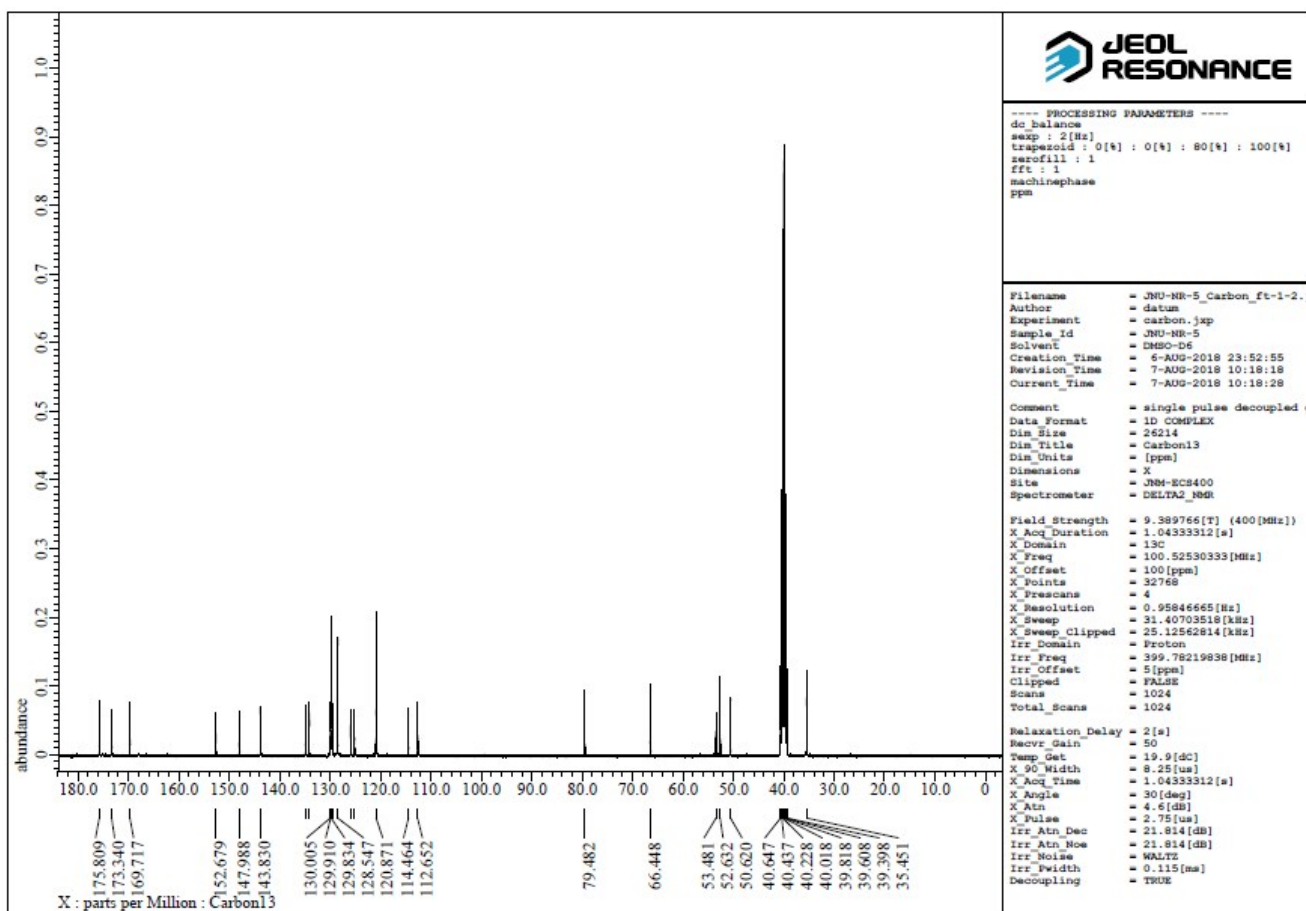

S-14: <sup>13</sup>C-NMR of 4f



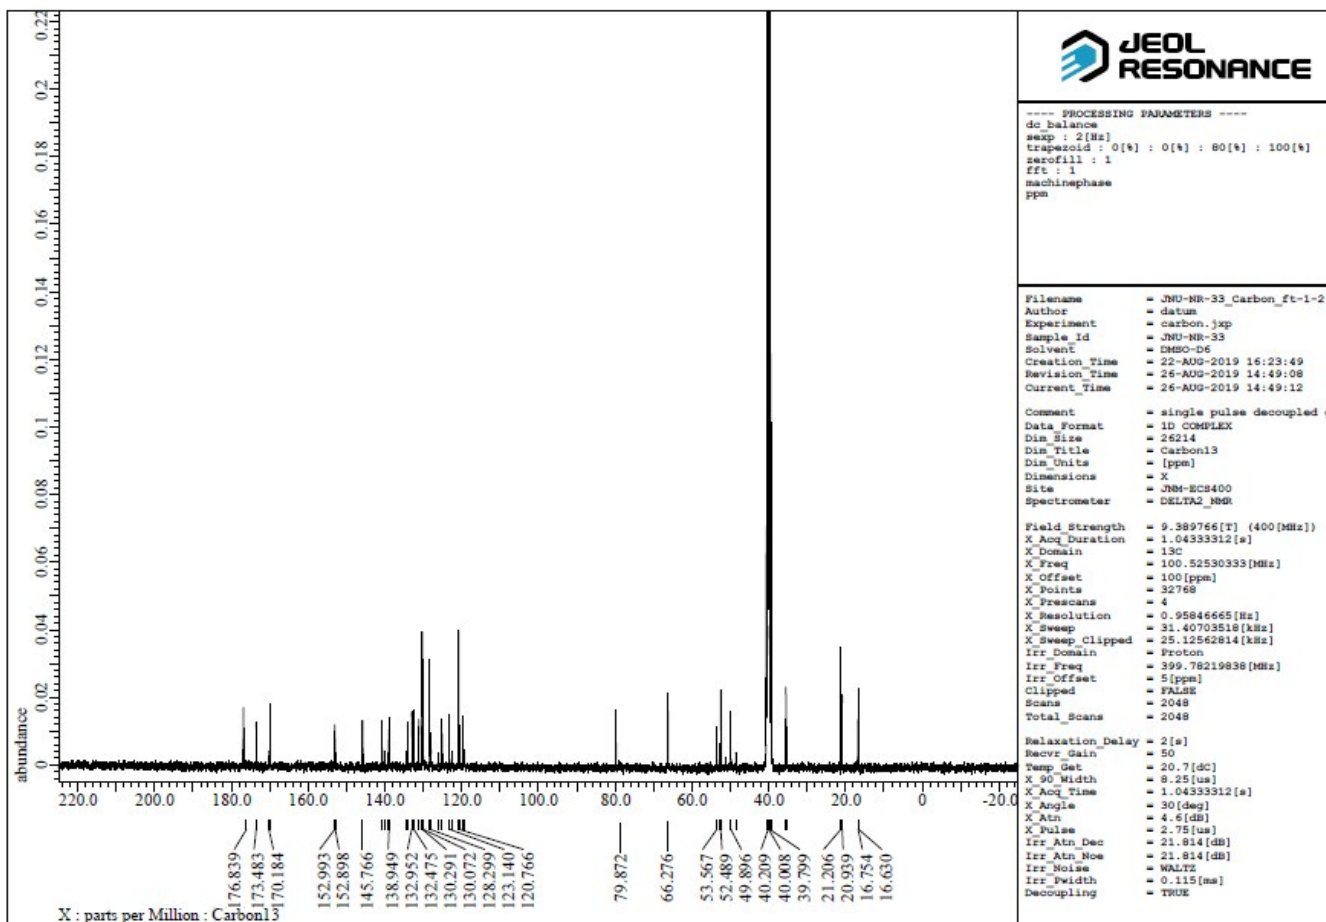

S-16:  $^{13}\text{C}$ -NMR of 4g

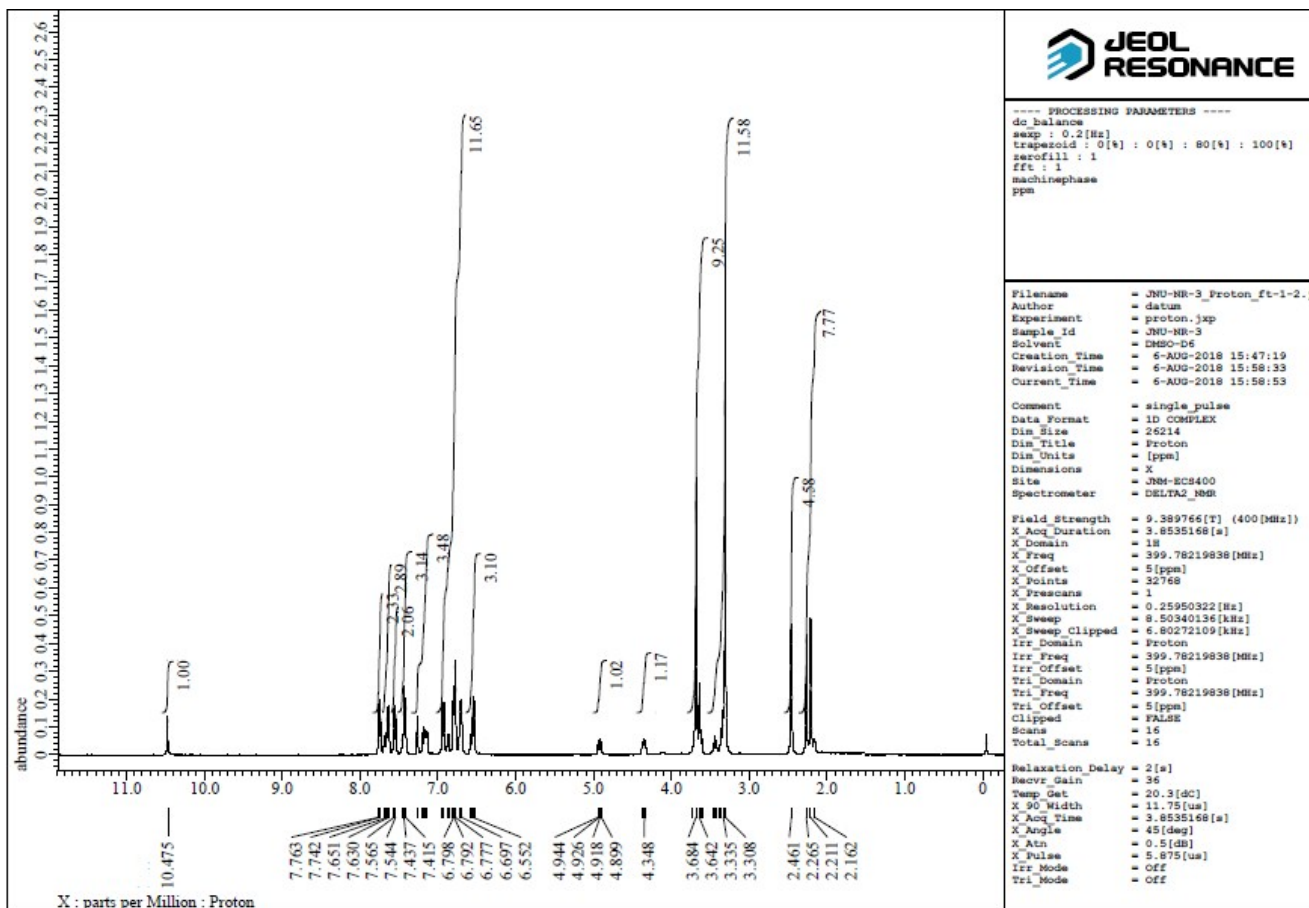

S-17: <sup>1</sup>H-NMR of 4h



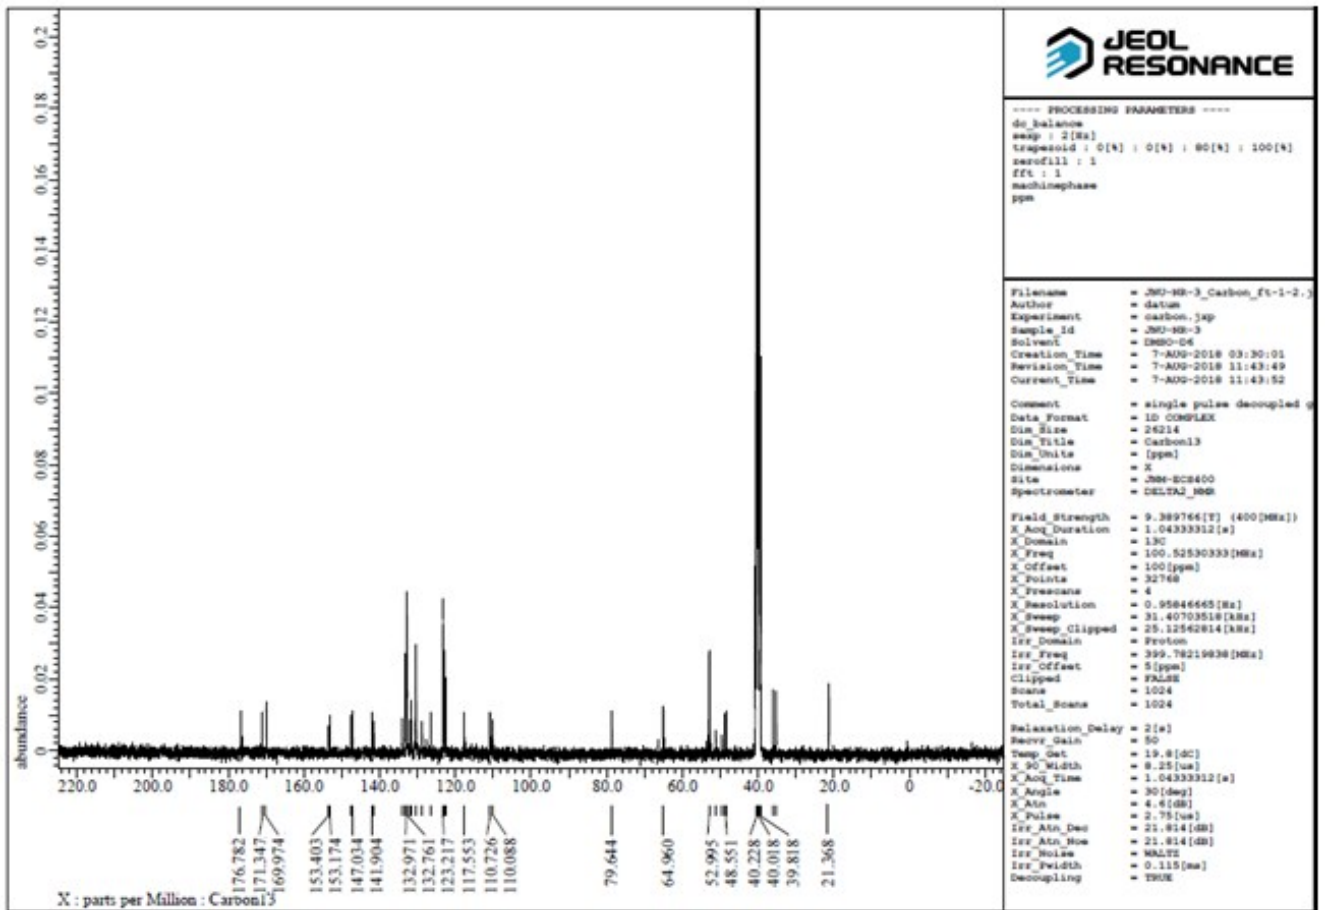

S-18:  $^{13}\text{C}$ -NMR of 4h

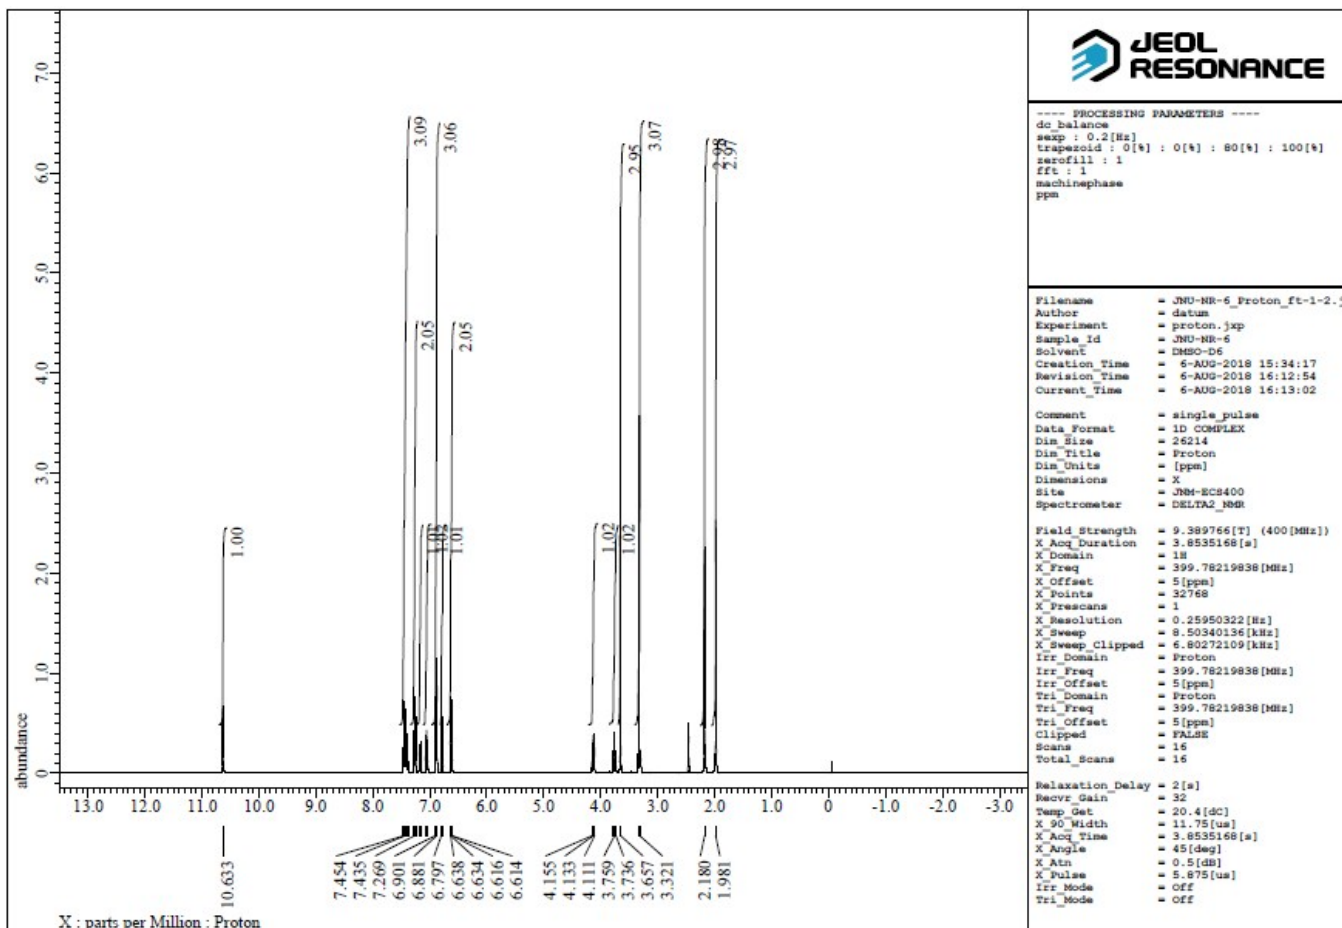

S-19: <sup>1</sup>H-NMR of 4i

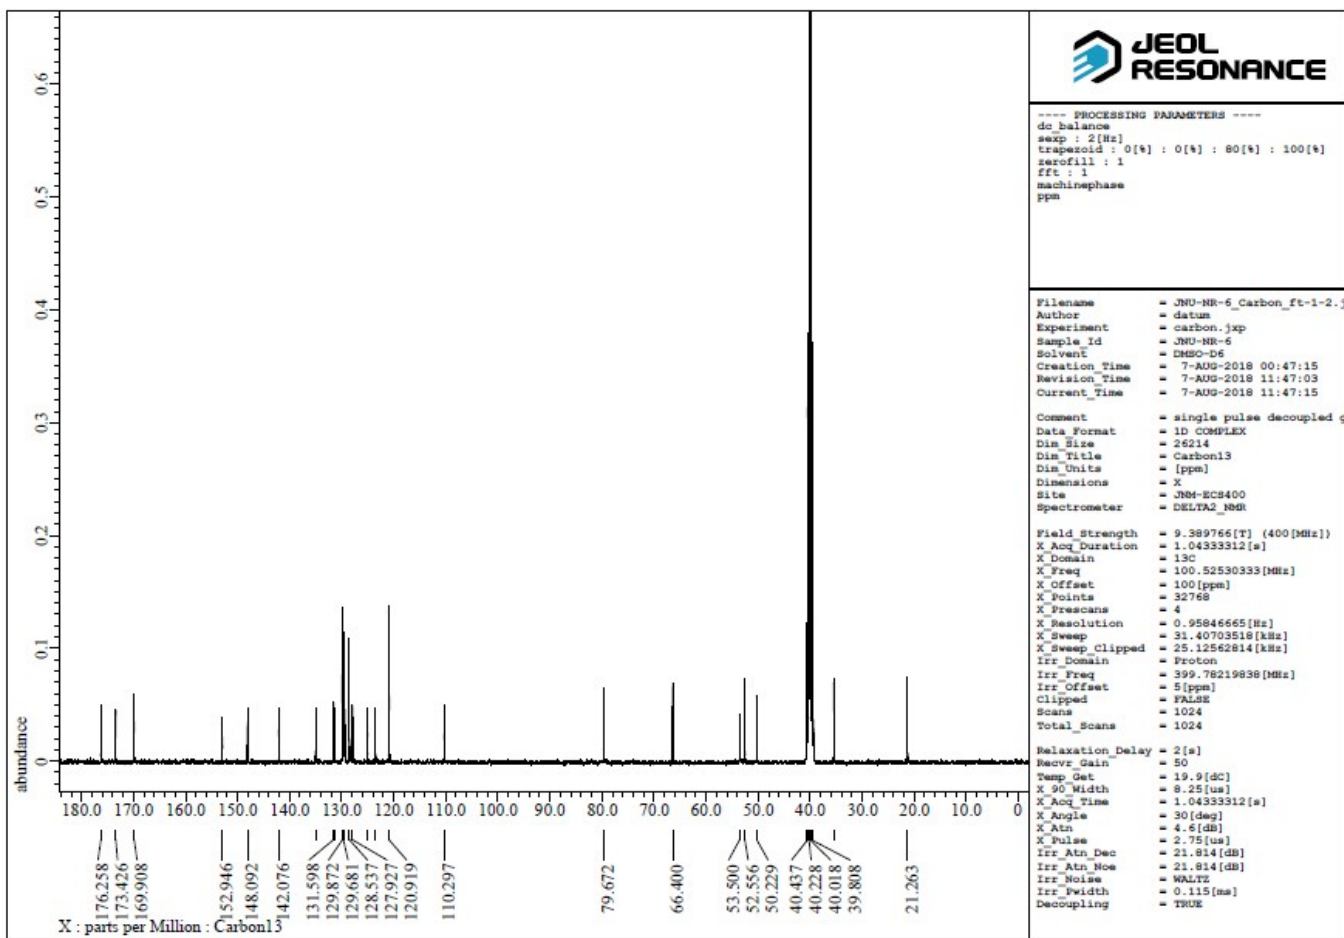

S-20: <sup>13</sup>C-NMR of 4i

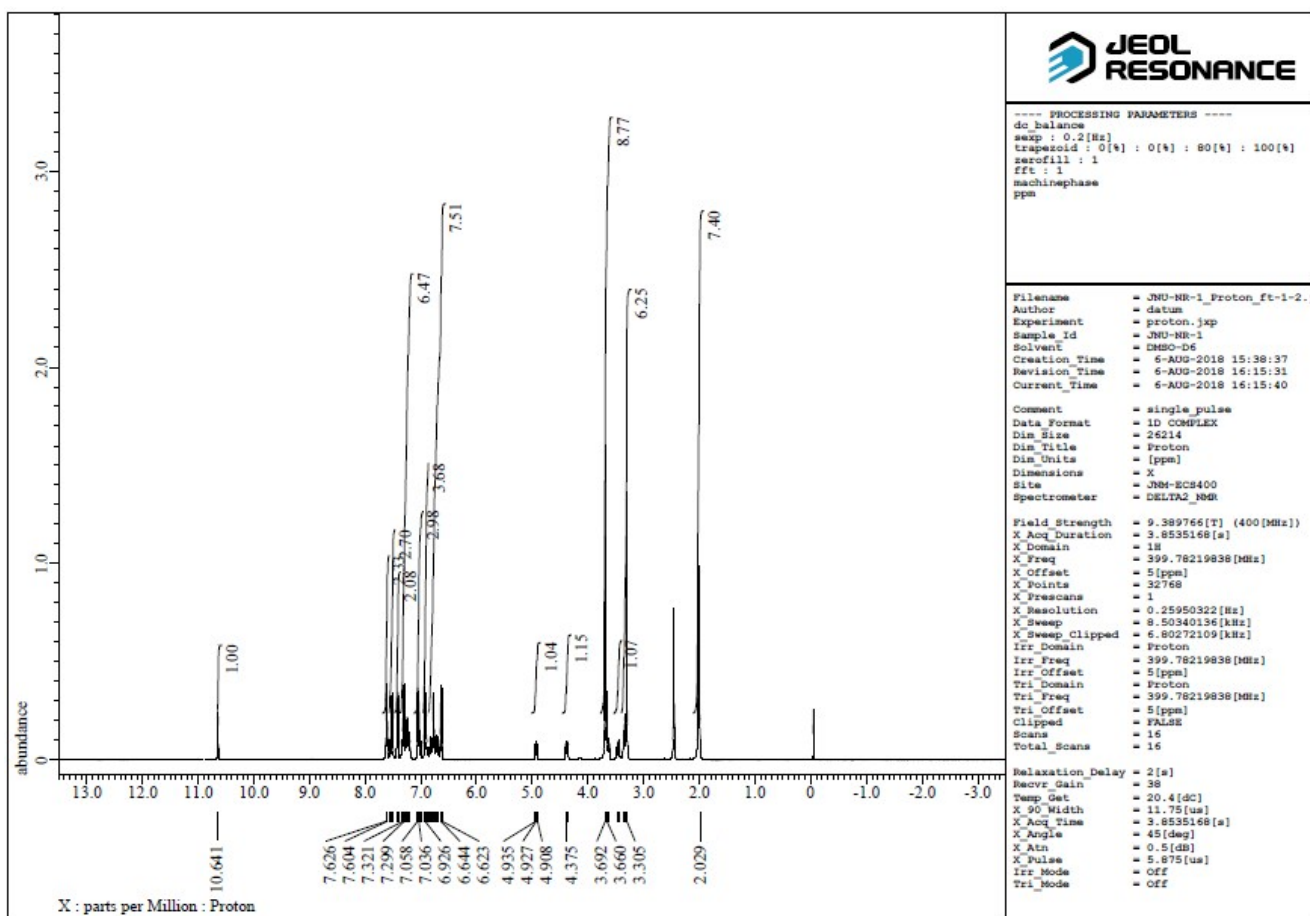

S-21: <sup>1</sup>H-NMR of 4j

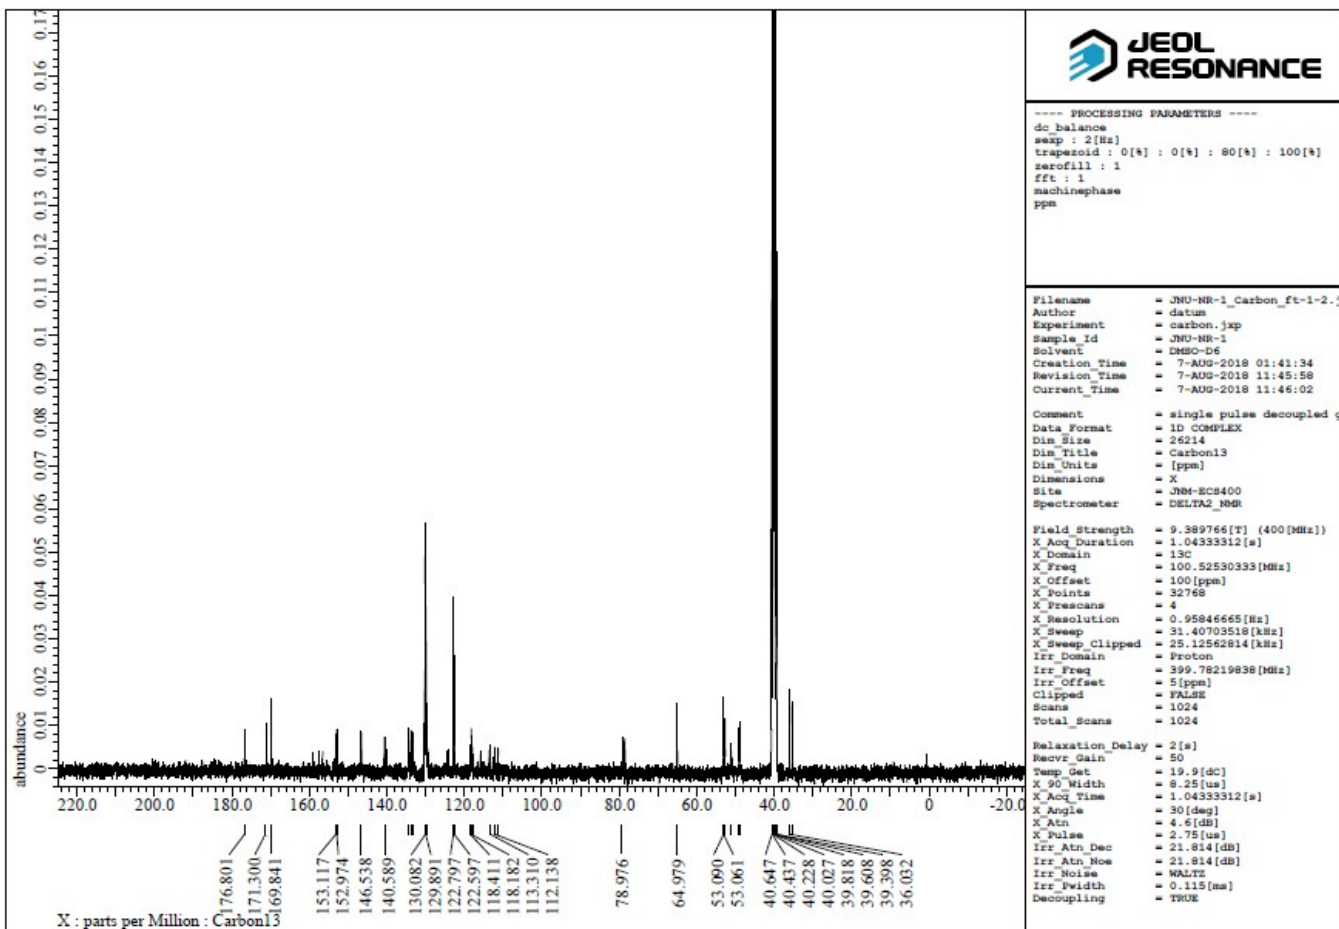

S-22: <sup>13</sup>C-NMR of 4j

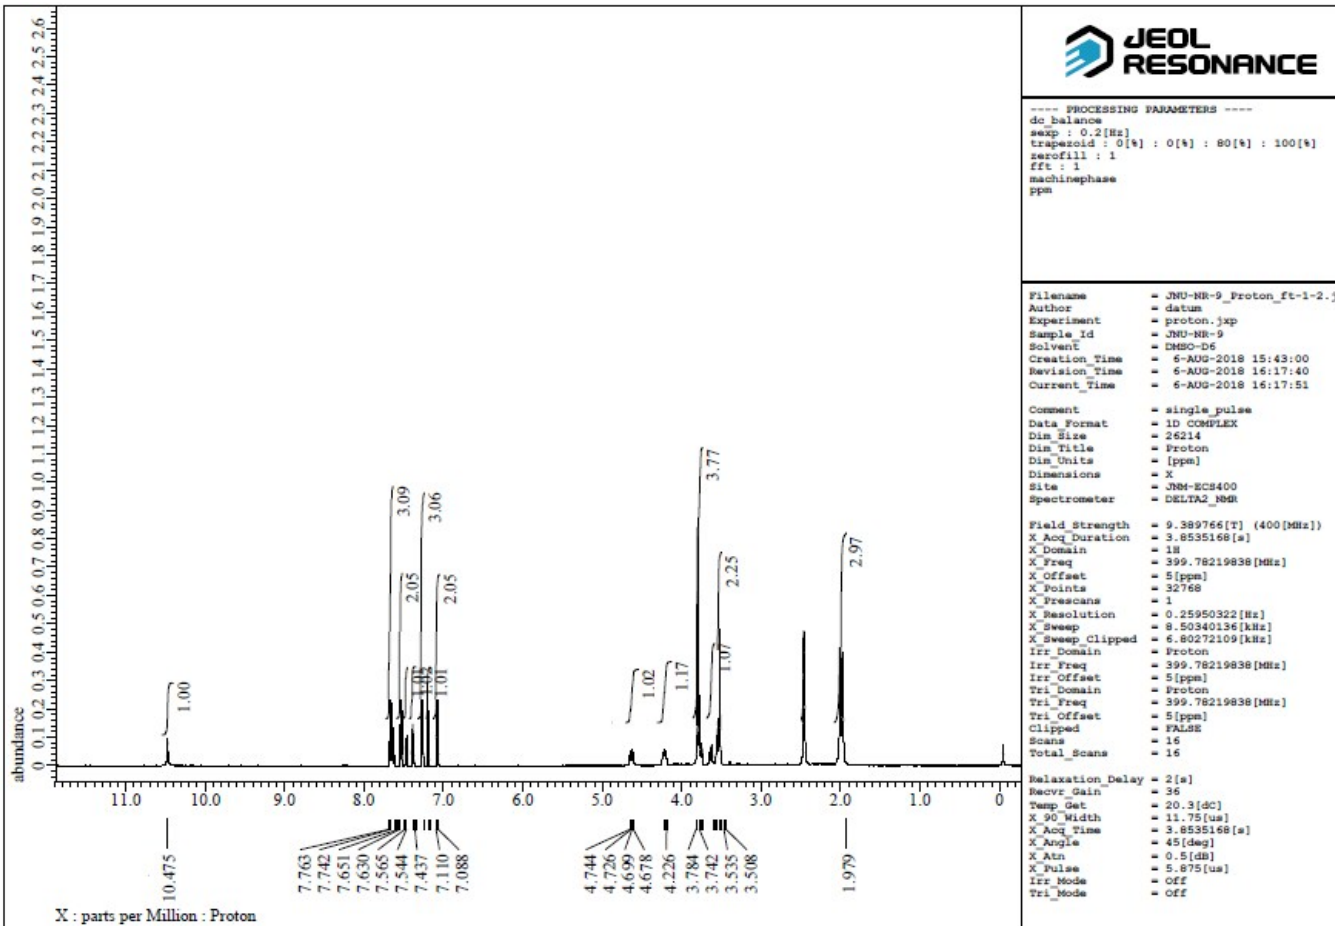

S-23: <sup>1</sup>H-NMR of 4k

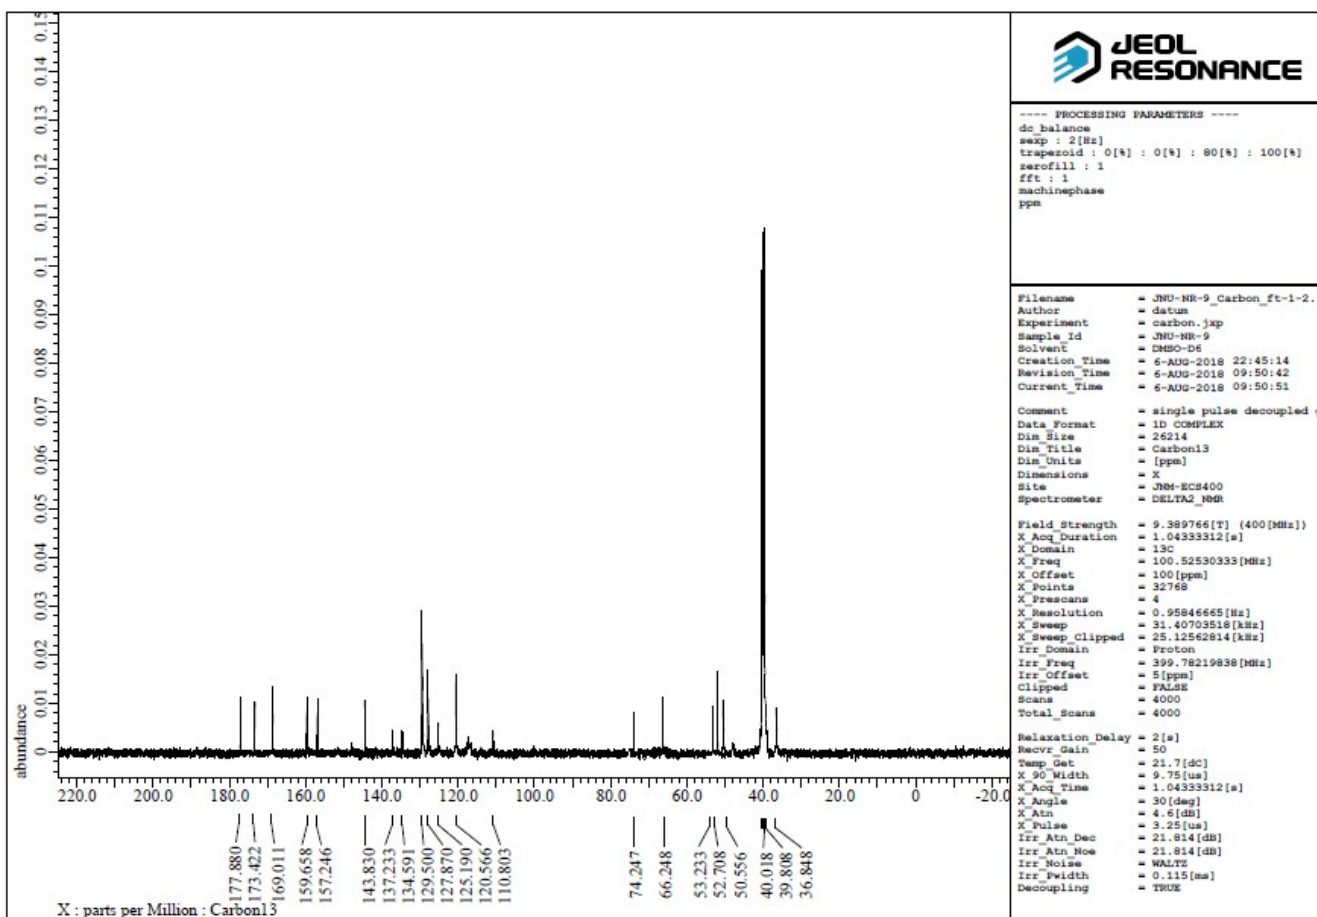

S-24: <sup>13</sup>C-NMR of 4k



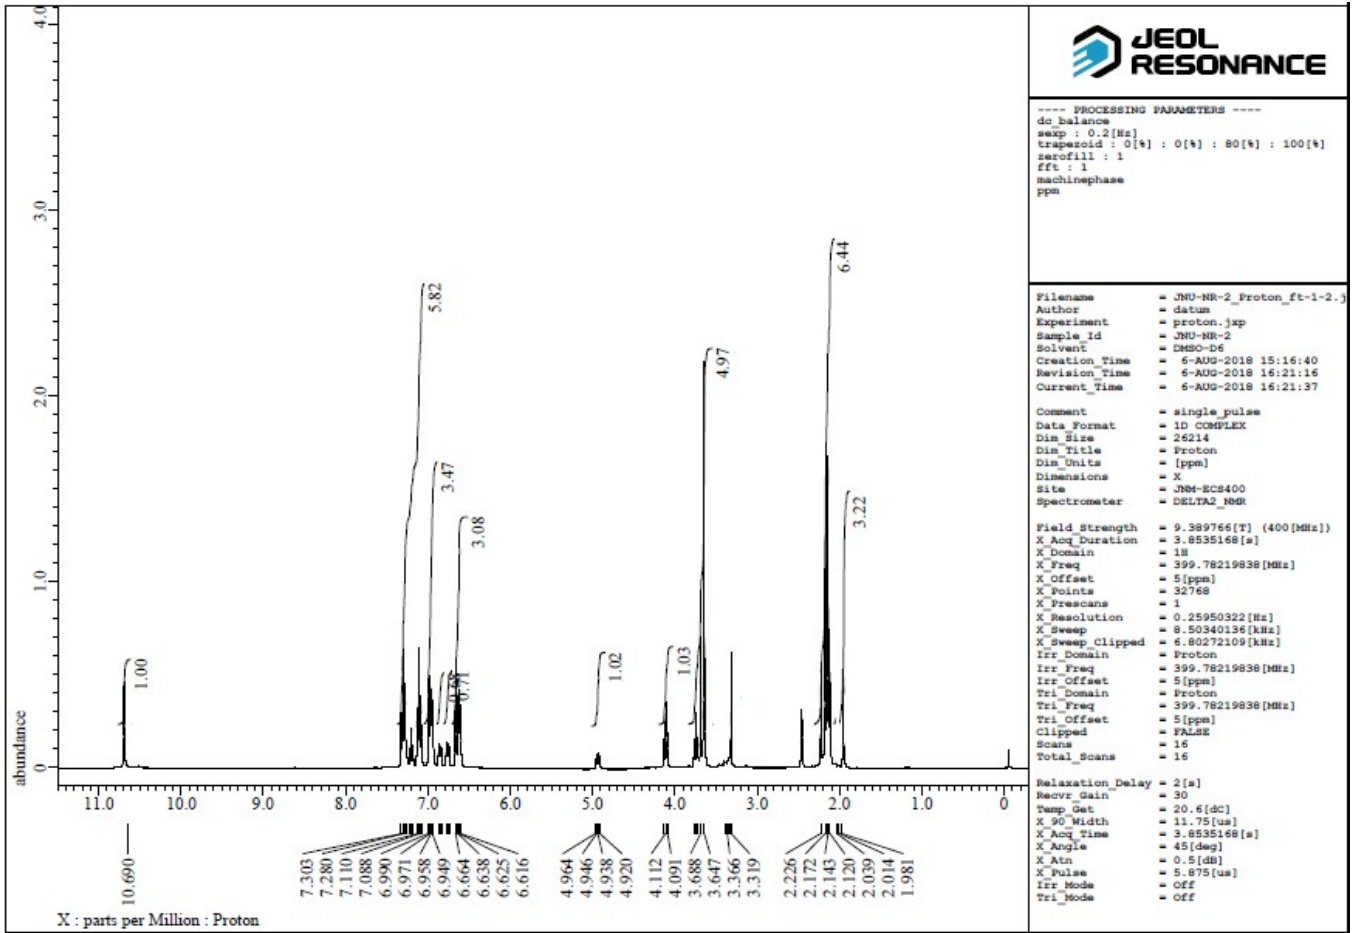

S-25: <sup>1</sup>H-NMR of 4l



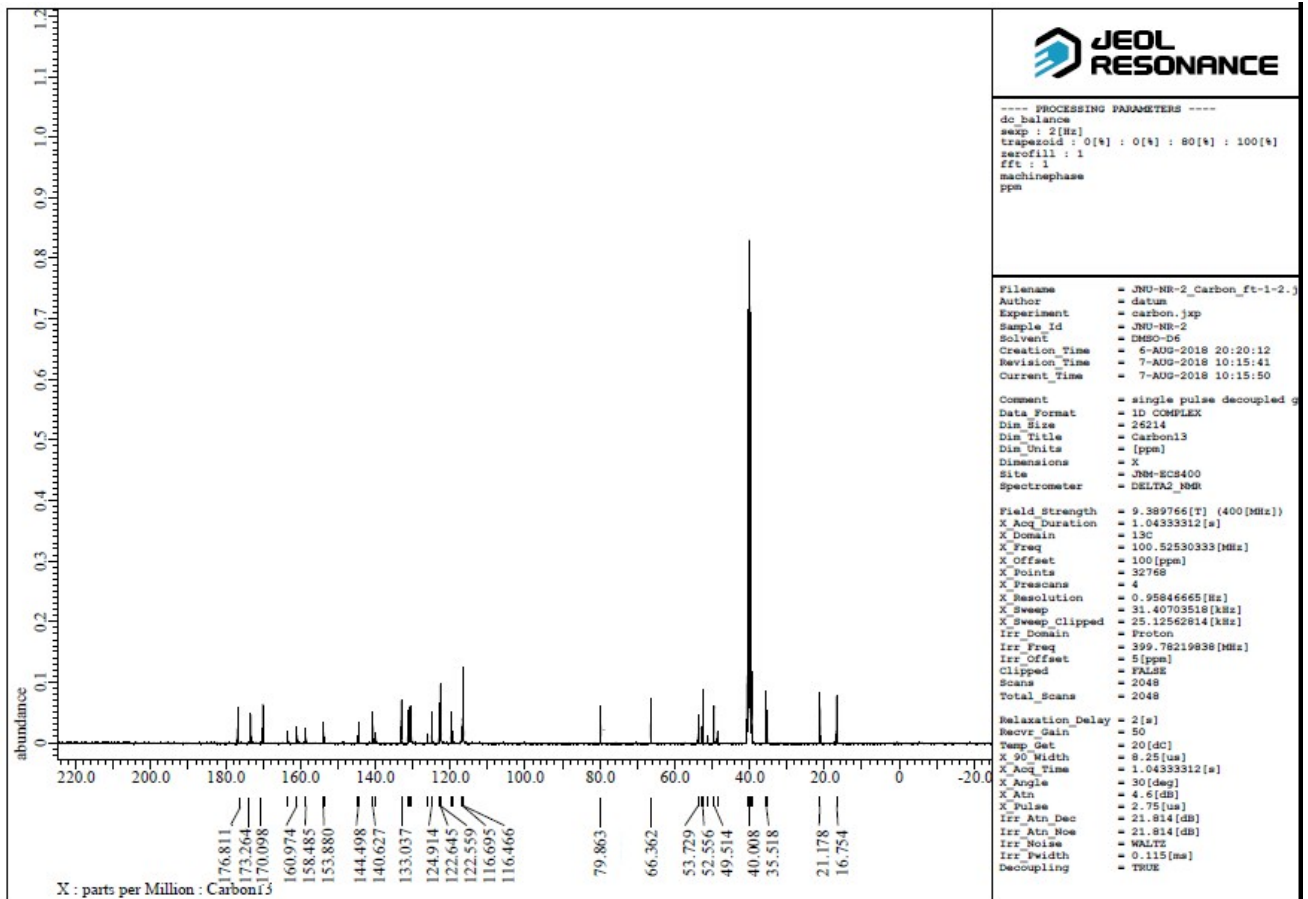

S-26: <sup>13</sup>C-NMR of 4I

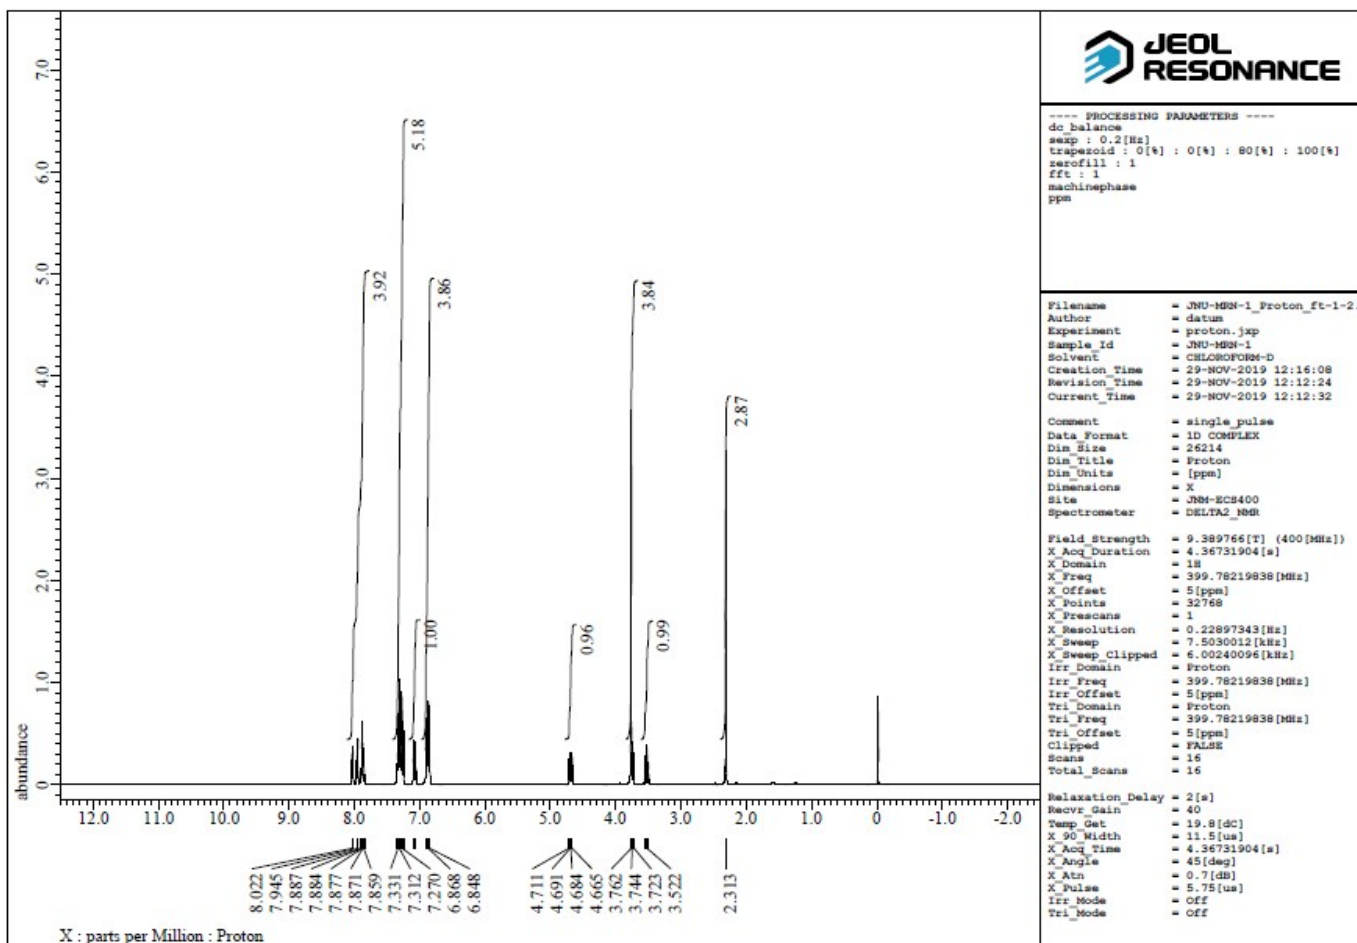

S-27: <sup>1</sup>H-NMR of 7a

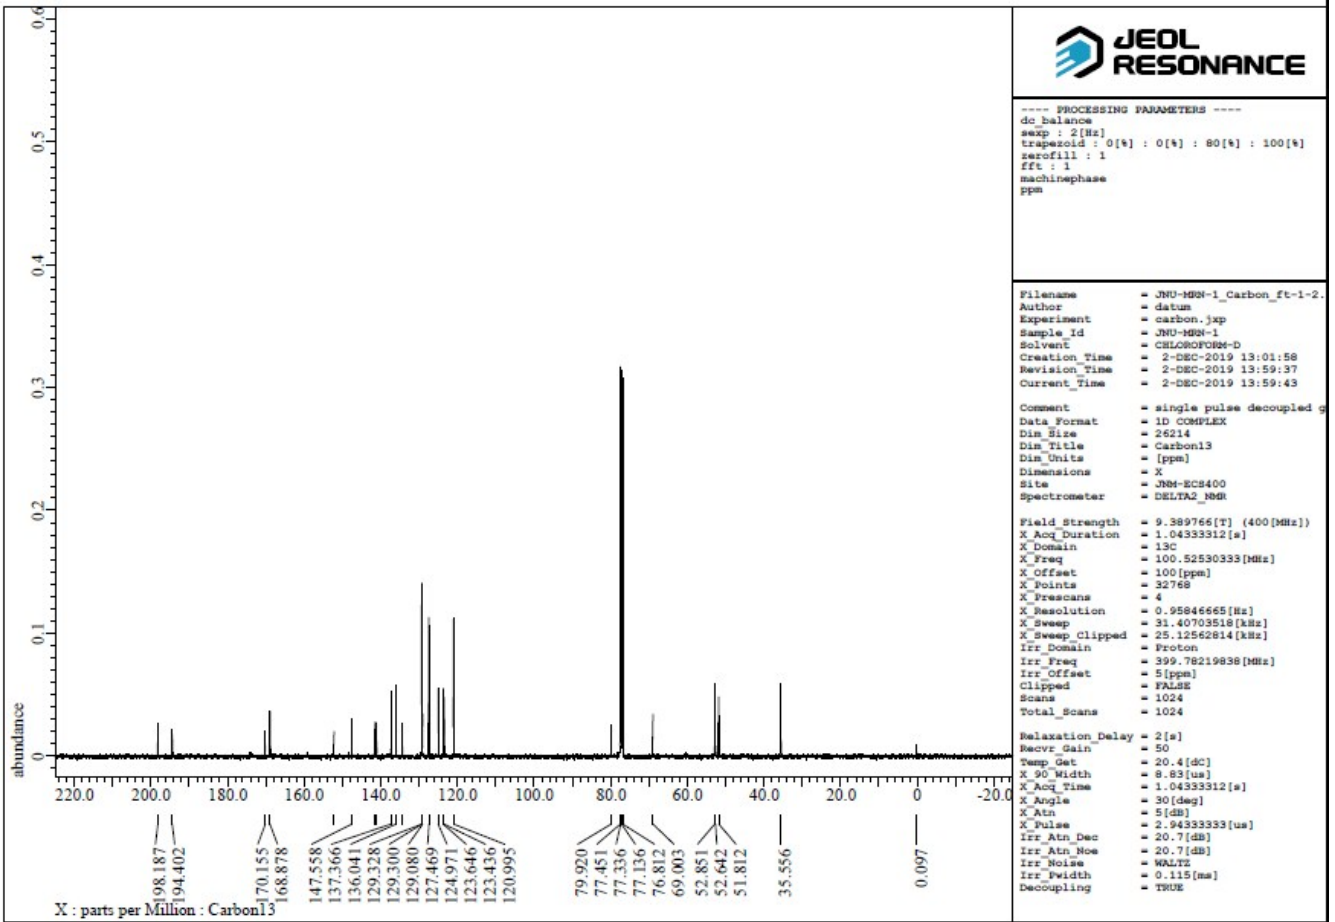

S-28: <sup>13</sup>C-NMR of 7a

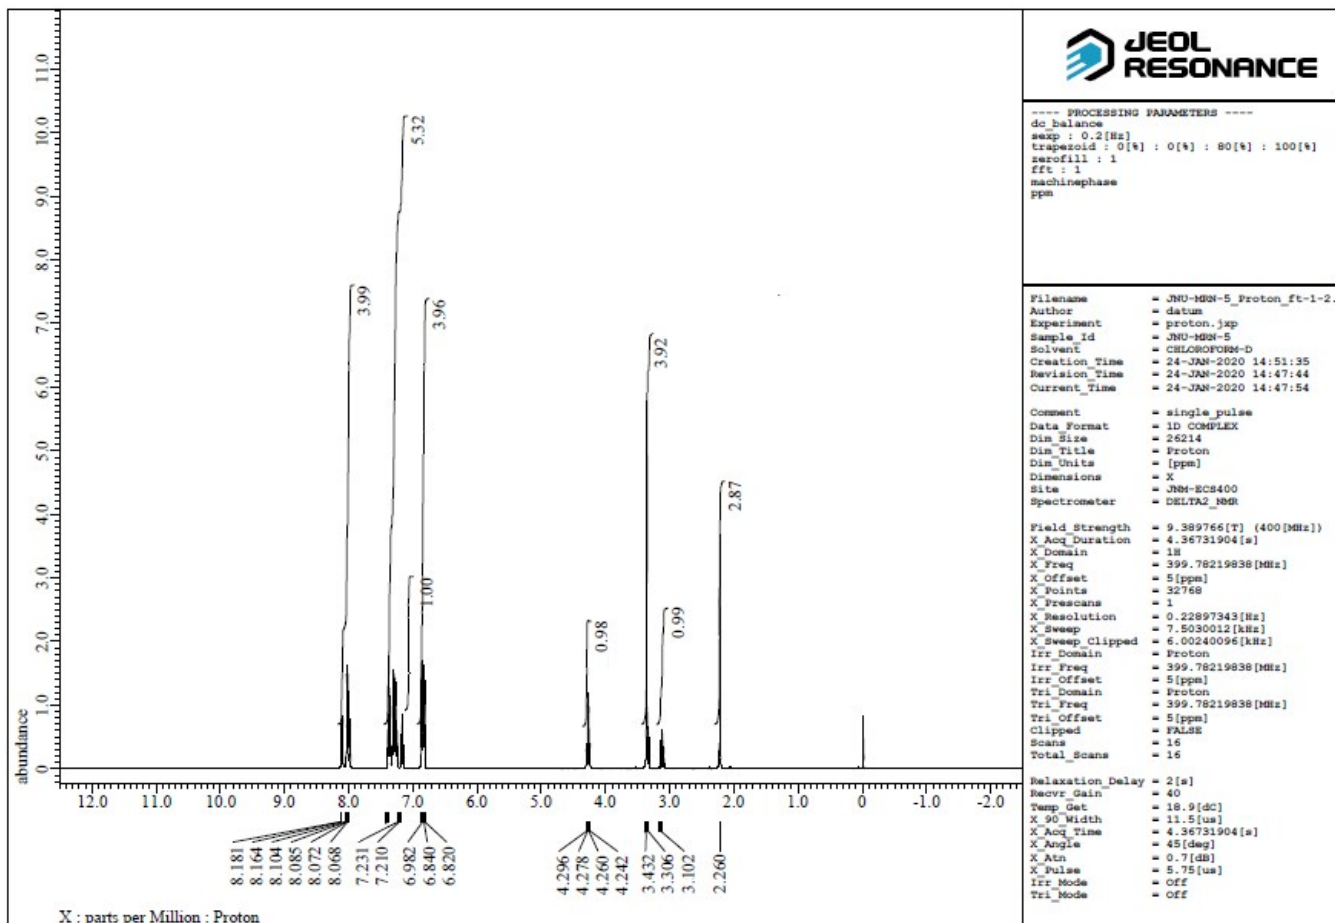

S-29: <sup>1</sup>H-NMR of 7b

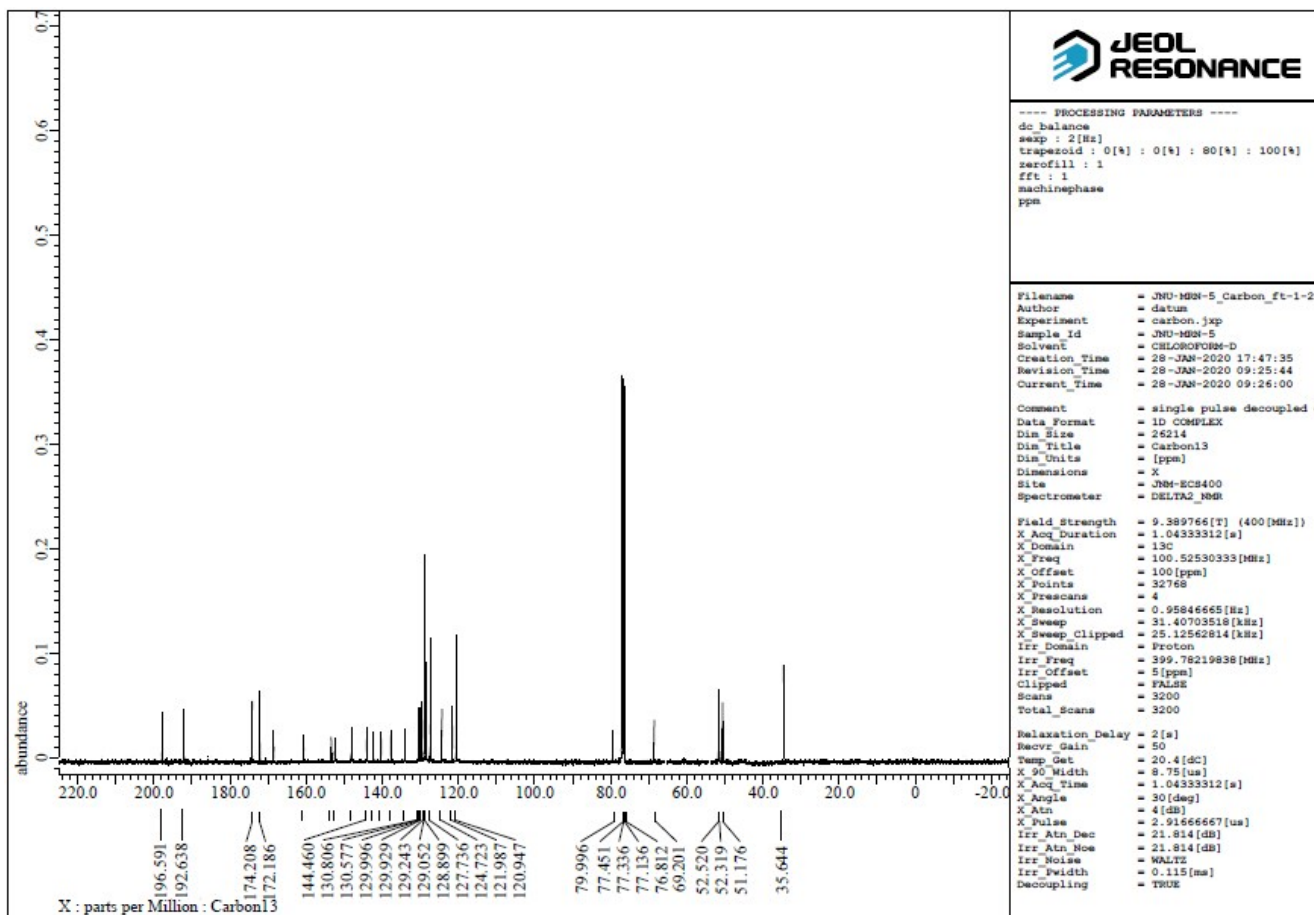

S-30: <sup>13</sup>C-NMR of 7b

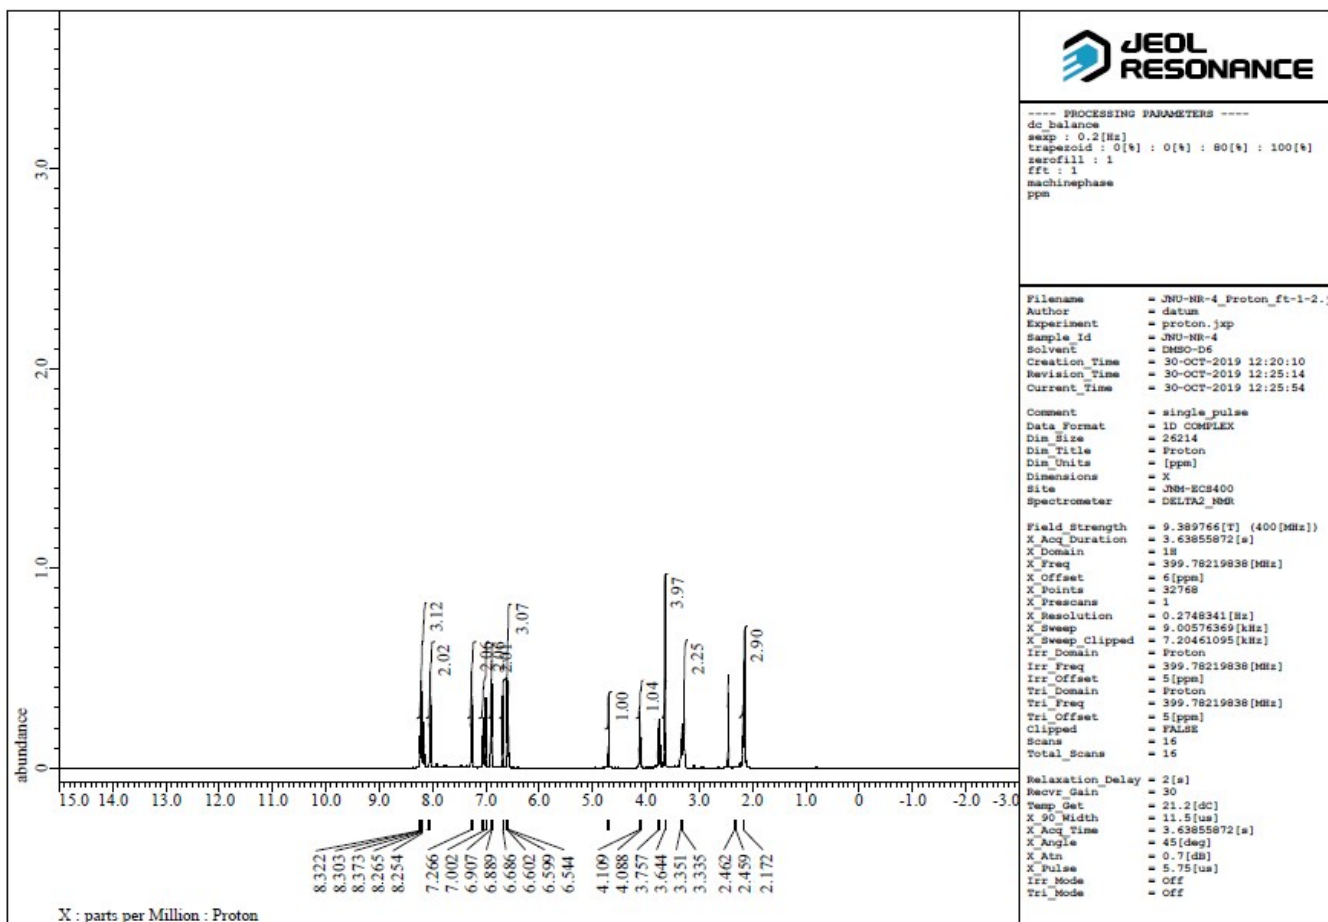

S-31: <sup>1</sup>H-NMR of 7c

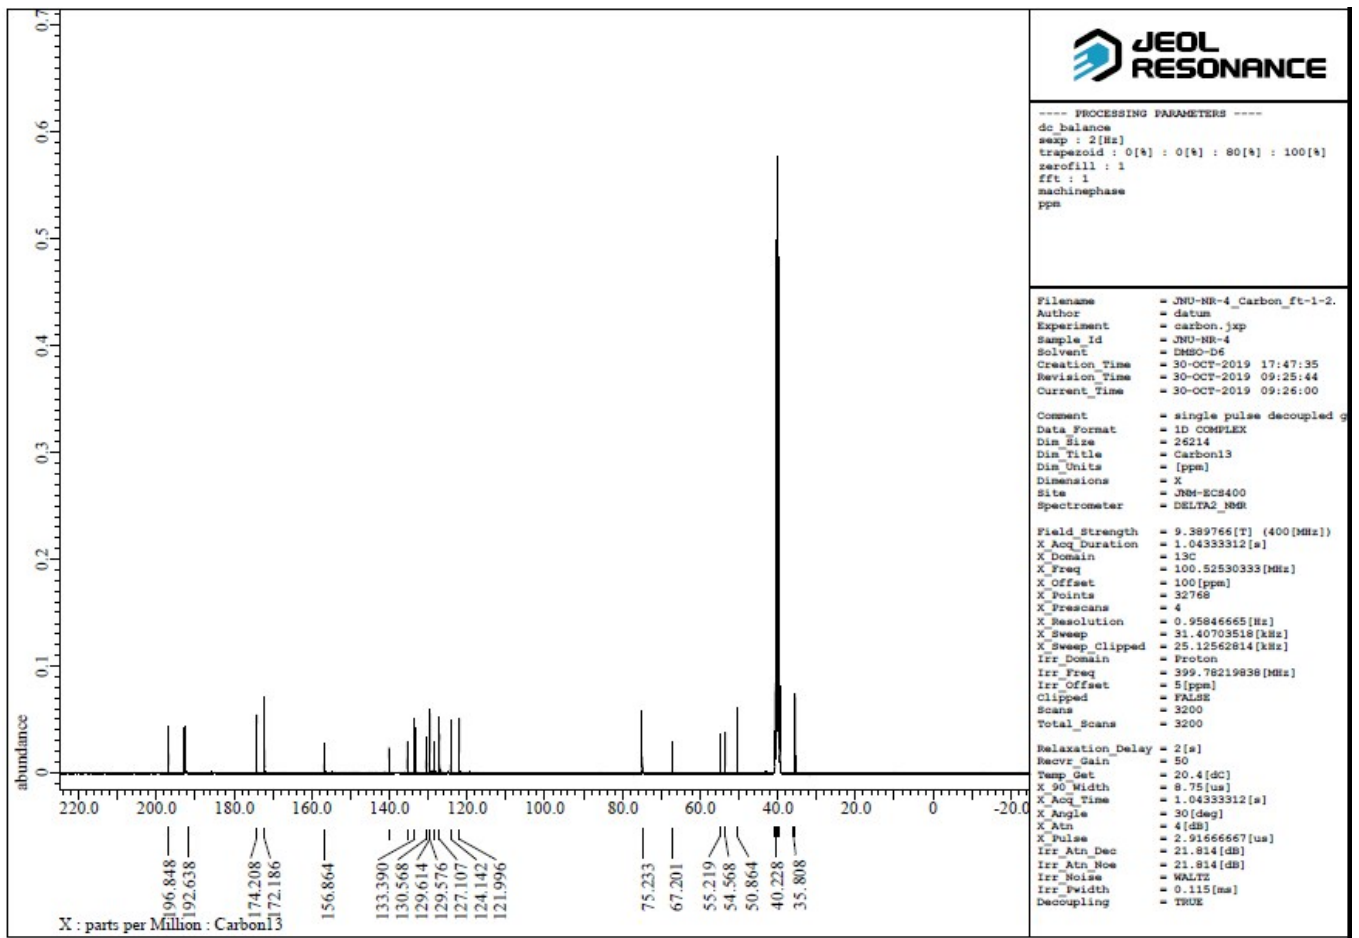

S-32: <sup>13</sup>C-NMR of 7c



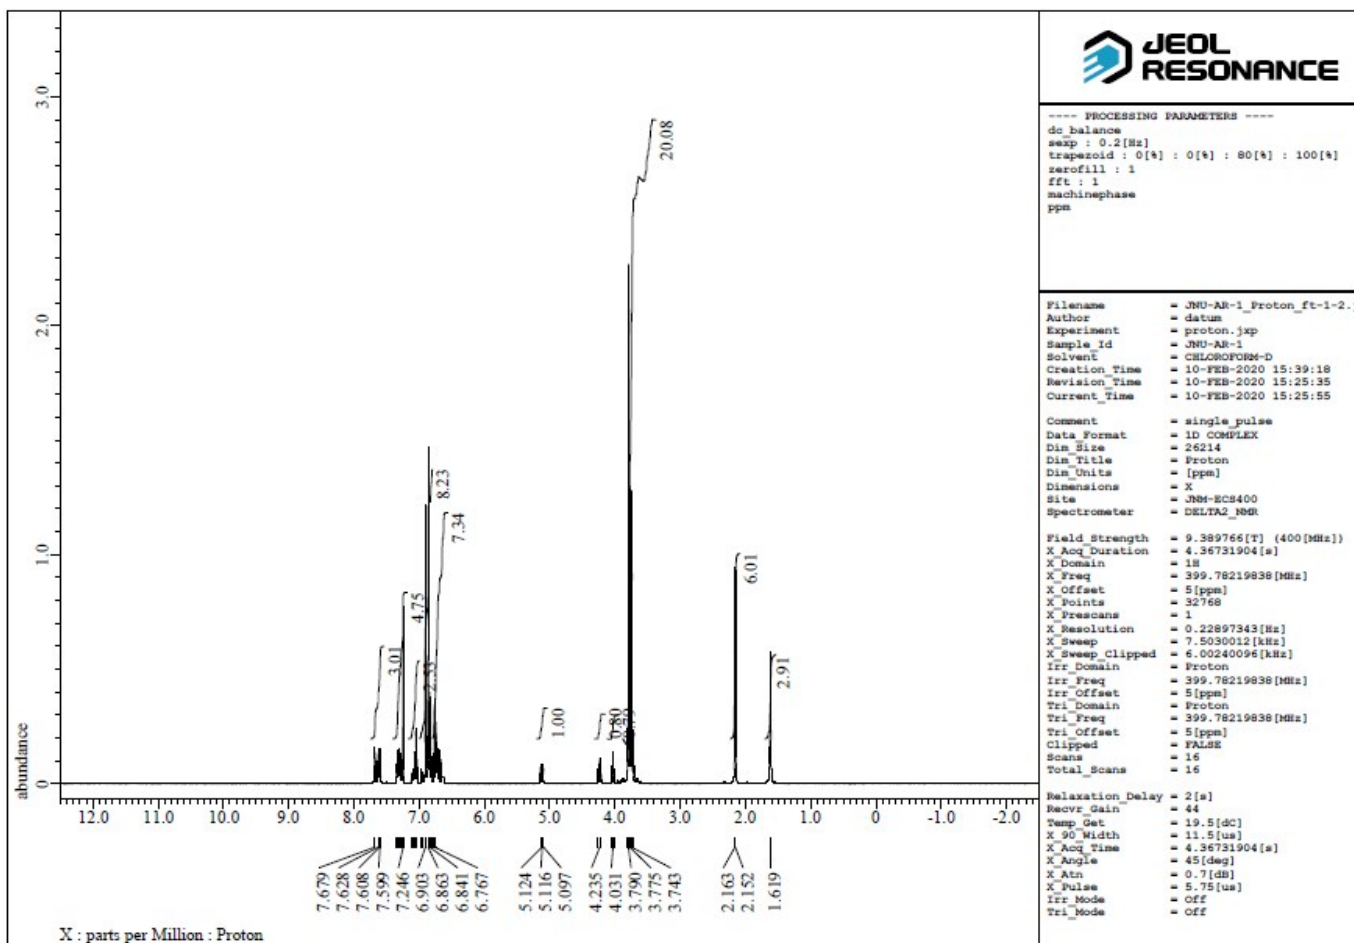

S-33: <sup>1</sup>H-NMR of 7d



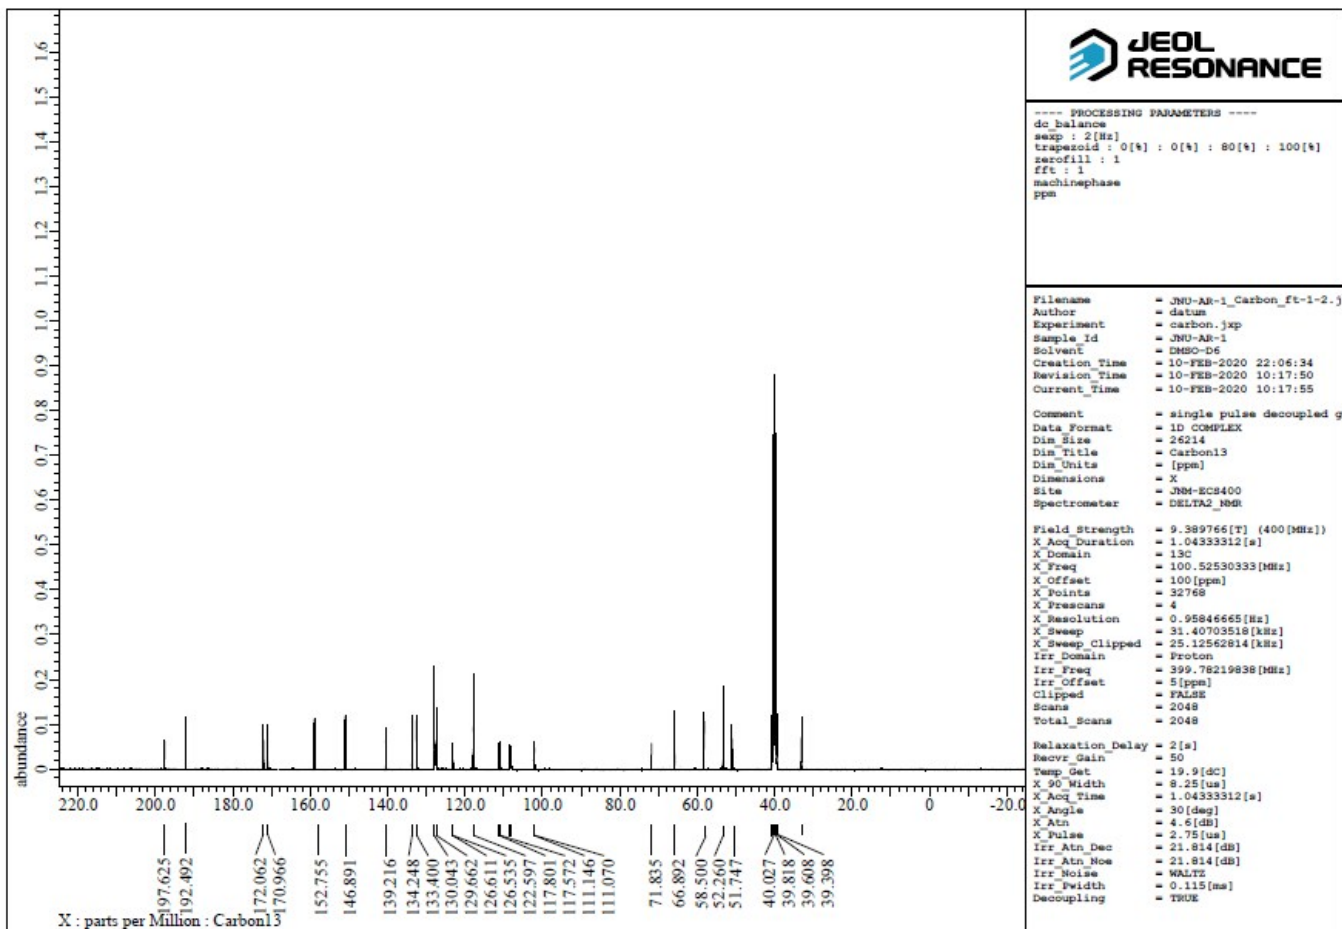

S-34: <sup>13</sup>C-NMR of 7d

Crystal data and structure refinement for **4d**.

|                                   |                                                                 |
|-----------------------------------|-----------------------------------------------------------------|
| Identification code               | Shelxl                                                          |
| Empirical formula                 | C <sub>30</sub> H <sub>28</sub> N <sub>4</sub> O <sub>4</sub> S |
| Formula weight                    | 540                                                             |
| Temperature                       | 296(2) K                                                        |
| Wavelength                        | 0.71073 Å                                                       |
| Crystal system, space group       | Triclinic, P-1                                                  |
| Unit cell dimensions              | a = 13.2006(11) Å    alpha = 113.018(3) deg.                    |
|                                   | b = 14.2388(11) Å    beta = 103.338(4) deg.                     |
|                                   | c = 17.0243(12) Å    gamma = 97.930(4) deg.                     |
| Volume                            | 2771.1(4) Å <sup>3</sup>                                        |
| Z, Calculated density             | 2, 1.297 Mg/m <sup>3</sup>                                      |
| Absorption coefficient            | 0.159 mm <sup>-1</sup>                                          |
| F(000)                            | 1138                                                            |
| Crystal size                      | 0.30 x 0.25 x 0.20 mm                                           |
| Theta range for data collection   | 1.59 to 28.32 deg.                                              |
| Limiting indices                  | -16 ≤ h ≤ 17, -17 ≤ k ≤ 18, -22 ≤ l ≤ 16                        |
| Reflections collected / unique    | 23290 / 12528 [R(int) = 0.0255]                                 |
| Completeness to theta =           | 28.32    90.7 %                                                 |
| Absorption correction             | Semi-empirical from equivalents                                 |
| Max. and min. transmission        | 0.9688 and 0.9538                                               |
| Refinement method                 | Full-matrix least-squares on F <sup>2</sup>                     |
| Data / restraints / parameters    | 12528 / 0 / 711                                                 |
| Goodness-of-fit on F <sup>2</sup> | 0.845                                                           |
| Final R indices [I > 2σ(I)]       | R1 = 0.0554, wR2 = 0.1612                                       |
| R indices (all data)              | R1 = 0.0873, wR2 = 0.2025                                       |
| Largest diff. peak and hole       | 0.823 and -0.559 e.Å <sup>-3</sup>                              |
